# Learning the Vector Coding of Egocentric Boundary Cells from Visual Data

1 **Author Names and Affiliations:** Yanbo Lian<sup>1‡\*</sup>, Simon Williams<sup>2‡\*</sup>, Andrew S. Alexander<sup>3</sup>, Michael E.  
2 Hasselmo<sup>3</sup>, Anthony N. Burkitt<sup>1</sup>

3 <sup>1</sup> Department of Biomedical Engineering, The University of Melbourne, Melbourne, VIC 3010, Australia

4 <sup>2</sup> Department of Electrical and Electronic Engineering, University of Melbourne, Melbourne, VIC 3010,  
5 Australia

6 <sup>3</sup> Center for Systems Neuroscience, Department of Psychological and Brain Sciences, Boston University,  
7 610 Commonwealth Ave., Boston, MA 02215, USA

8 ‡These authors contributed equally to this work.

9 \***Correspondence:** yanbo.lian@unimelb.edu.au, simon.williams@unimelb.edu.au

10 **Author Contribution Statement:** YL, SW, ASA, MEH and ANB conceived the work. YL and SW de-  
11 signed the model. ASA and MEH provided experimental data. YL, SW and ASA analysed the model  
12 results. YL and SW wrote the first draft of the manuscript. All authors participated in writing and editing of  
13 the manuscript.

14 **Acknowledgements:** This work received funding from the Australian Government, via grant AUS-  
15 MURIB000001 associated with ONR MURI grant N00014-19-1-2571. This research was also supported  
16 by NIH NINDS K99 NS119665, NIMH R01 MH120073; Office of Naval Research MURI grant N00014-  
17 16-1-2832; Office of Naval Research MURI N00014-19-1-2571; and Office of Naval Research DURIP  
18 N00014-17-1-2304.

19 **Conflict of interest statement:** The authors declare no competing financial interests.

## 20 **Abstract**

21 The use of spatial maps to navigate through the world requires a complex ongoing transformation of ego-  
22 centric views of the environment into position within the allocentric map. Recent research has discovered  
23 neurons in retrosplenial cortex and other structures that could mediate the transformation from egocentric  
24 views to allocentric views. These egocentric boundary cells respond to the egocentric direction and dis-  
25 tance of barriers relative to an animals point of view. This egocentric coding based on the visual features of  
26 barriers would seem to require complex dynamics of cortical interactions. However, computational models  
27 presented here show that egocentric boundary cells can be generated with a remarkably simple synaptic  
28 learning rule that forms a sparse representation of visual input as an animal explores the environment. Sim-  
29 ulation of this simple sparse synaptic modification generates a population of egocentric boundary cells with  
30 distributions of direction and distance coding that strikingly resemble those observed within the retrosplenial  
31 cortex. This provides a framework for understanding the properties of neuronal populations in the retrosple-  
32 nial cortex that may be essential for interfacing egocentric sensory information with allocentric spatial maps  
33 of the world formed by neurons in downstream areas including the grid cells in entorhinal cortex and place  
34 cells in the hippocampus.

## 35 **1 Introduction**

36 Animals can perform extremely complex spatial navigation tasks, but how the brain implements a naviga-  
37 tional system to accomplish this remains largely unknown. In the past few decades, many functional cells  
38 that play an important role in spatial cognition have been discovered, including place cells ([O'Keefe and](#)  
39 [Dostrovsky, 1971](#); [O'Keefe, 1976](#)), head direction cells ([Taube et al., 1990a,b](#)), grid cells ([Hafting et al.,](#)  
40 [2005](#); [Stensola et al., 2012](#)), boundary cells ([Solstad et al., 2008](#); [Lever et al., 2009](#)), and speed cells ([Kropff](#)  
41 [et al., 2015](#); [Hinman et al., 2016](#)). All of these cells have been investigated in the allocentric reference frame  
42 that is viewpoint-invariant.

43 However, animals experience and learn about environmental features through exploration using sensory  
44 input that is in their egocentric reference frame. Recently, some egocentric spatial representations have  
45 been found in multiple brain areas such as lateral entorhinal cortex ([Wang et al., 2018](#)), postrhinal cortices

46 (Gofman et al., 2019; LaChance et al., 2019), dorsal striatum (Hinman et al., 2019), and the retrosplenial  
47 cortex (RSC) (Wang et al., 2018; Alexander et al., 2020). In the studies by Hinman et al. (2019) and  
48 Alexander et al. (2020), a very interesting type of spatial cell, the egocentric boundary cell, was discovered.  
49 Similar to allocentric boundary cells (Solstad et al., 2008; Lever et al., 2009), egocentric boundary cells  
50 (EBCs) possess vectorial receptive fields sensitive to the bearing and distance of nearby walls or boundaries,  
51 but in the egocentric reference frame. For example, an EBC of a rat that responds whenever there is a wall  
52 at a particular distance on the left of the rat means that the response of the EBC not only depends on the  
53 location of the animal but also its running direction or head direction, i.e., the cell is tuned to a wall in the  
54 animal-centered reference frame.

55 Alexander et al. (2020) identified three categories of EBCs in the rat RSC: proximal EBC whose egocentric  
56 receptive field boundary is close to the animal, distal EBC whose egocentric receptive field boundary is  
57 further away from the animal, and inverse EBC that respond everywhere in the environment except when  
58 the animal is close to the boundary. Some examples of proximal, distal and inverse EBCs are shown in  
59 Figure 1. Furthermore, EBCs in this area display a considerable diversity in vector coding; namely the  
60 EBCs respond to egocentric boundaries at various orientations and distances. Somewhat surprisingly, there  
61 are also EBCs tuned to a wall that is behind the animal (see the bottom plot of Figure 1b for an example).

62 Though there is increasing experimental evidence that suggests the importance of egocentric spatial cells,  
63 there have been few studies explaining how egocentric boundary cells are formed and whether they emerge  
64 from neural plasticity.

65 In this study, we show how EBCs can be generated through a learning process based upon sparse coding  
66 that uses visual information as the input. Furthermore, the learnt EBCs show a diversity of types, namely  
67 proximal, distal and inverse, and they fire for boundaries at different orientations and distances, similar  
68 to that observed in the experimental study of the vector coding for EBCs (Alexander et al., 2020). As  
69 Bicanski and Burgess (2020) pointed out in a recent review, the fact that some EBCs respond for boundaries  
70 behind the animal suggests that these cells do not solely rely on sensory input and appear to incorporate  
71 some mnemonic components. However, our model shows that by solely taking visual input, without any  
72 mnemonic component, some learnt EBCs respond to boundaries that are behind the animal and out of view.

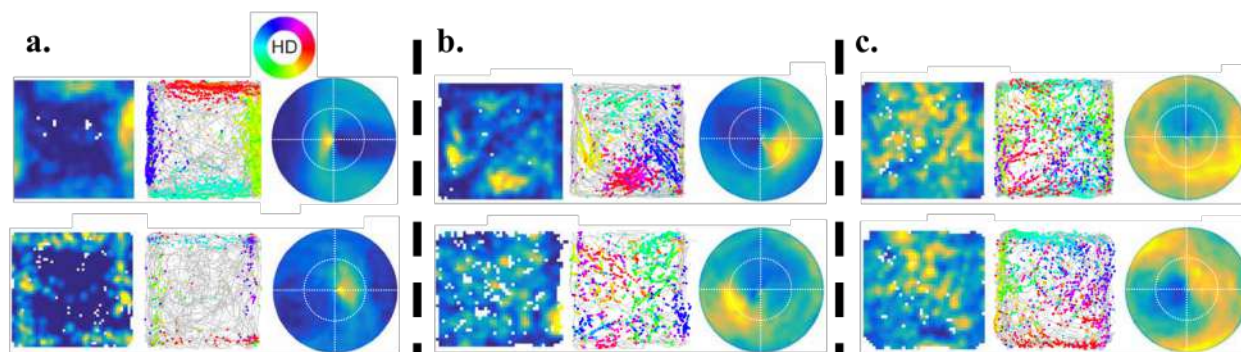

Figure 1: **Six example EBCs from Alexander et al. (2020).** The plots in the left column are the 2D spatial ratemaps, the middle column plots are trajectory plots showing firing locations and head directions (according to the circular color legend shown above **a**), and the right column plots are the receptive fields of the respective EBCs (front direction corresponds to top of page). **a**) Proximal EBCs whose receptive field is a wall close to the animal. The two example EBCs displayed here are selective to proximal walls of left and right, respectively. **b**) Distal EBCs whose receptive field is a wall further from the animal. The two example EBCs displayed here are selective to distal walls of rear-right and behind, respectively. **c**) Inverse EBCs that fire everywhere except when there is wall near the animal. The two example EBCs displayed here only stop firing when there are wall in front of and on the left of the animal, respectively.

73 These boundaries can, nevertheless, be inferred from distal visual cues, suggesting that the competition  
74 introduced by sparse coding drives different model cells to learn responses to boundaries at a wide range of  
75 different directions.

76 We next show that the model based on sparse coding that takes visual input while a simulated animal ex-  
77 plores freely in a 2D environment can learn EBCs with diverse tuning properties and these learnt EBCs can  
78 generalize to novel environments.

## 79 **2 Materials and Methods**

### 80 **2.1 The simulated environment, trajectory and visual input**

#### 81 **2.1.1 Environment**

82 The simulated environment is programmed to match the experimental setup of Alexander et al. (2020) as  
83 closely as possible. It consists of a virtual walled arena 1.25 m by 1.25 m. One virtual wall is white and the  
84 other three are black. The floor is a lighter shade of grey with RGB values (0.4, 0.4, 0.4).

## 85 **2.1.2 Trajectory**

86 The simulated trajectory is generated randomly using the parameters from [Raudies and Hasselmo \(2012\)](#).  
87 The simulated animal starts in the center of the arena facing north with the white wall to the right. This is  
88 used as the  $0^\circ$  bearing direction. The velocity of the animal is sampled from a Rayleigh distribution with  
89 mean 13 cm/s while enforcing a minimum speed of 5 cm/s.

90 The direction of motion is modelled by a random walk for the bearing, where the change in bearing at each  
91 time step is sampled from a zero mean normal distribution with standard deviation  $340^\circ$  per second and  
92 scaled to the length of the time step.

93 A complication for the simulation is how to deal with the walls. Following [Raudies and Hasselmo \(2012\)](#),  
94 we encode the following. If the simulated animal will approach within 2 cm of one of the walls on its  
95 next step, its velocity is adjusted to halfway between the current speed and the minimum speed (5 cm/s).  
96 Additionally we change the bearing by turning away from the wall by  $90^\circ$ .

## 97 **2.1.3 Visual input**

98 The simulated environment and trajectory above are realised using the Panda3D game engine ([panda3d.org](#)),  
99 an open-source framework for creating virtual visual environments, usually for games. The visual  
100 input of the simulated animal is modelled using a camera with a  $170^\circ$  field of horizontal view to mimic the  
101 wide visual field of rat and a  $110^\circ$  field of vertical view. This input is used to generate a grayscale 8-bit  
102 image  $170 \times 110$  pixels, which corresponds approximately to the visual acuity of the rat, namely 1 cycle per  
103 degree ([Prusky et al., 2000](#)). The camera is always facing front, meaning that the head direction is aligned  
104 with the movement direction for the simulated animal. The simulation is run at 30 frames per second until  
105 40000 frames have been collected, which approximately corresponds to a running trajectory over a period  
106 of 1300 s (21 min, 40 s).

107 Model results shown in this paper are based on the visual input with  $170^\circ$  field of view (FOV) except  
108 Section 3.3 where different FOVs ( $60^\circ$ ,  $90^\circ$ ,  $120^\circ$ ,  $150^\circ$ , and  $170^\circ$ ) are simulated to investigate how the  
109 width of FOV affects the distribution of learnt EBCs.

## 110 **2.2 Learning egocentric boundary cells (EBCs)**

### 111 **2.2.1 Non-negative sparse coding**

112 Sparse coding (Olshausen and Field, 1996, 1997) was originally proposed to demonstrate that simple cells  
113 in the primary visual cortex (V1) encode visual input using an efficient representation. The essence of  
114 sparse coding is the assumption that neurons within a network can represent the sensory input using a linear  
115 combination of some relatively small set of basis features (Olshausen and Field, 1997). Along with its  
116 variant, non-negative sparse coding (Hoyer, 2003), the principle of sparse coding provides a compelling  
117 explanation for neurophysiological findings for many brain areas such as the retina, visual cortex, auditory  
118 cortex, olfactory cortex, somatosensory cortex and other areas (see Beyeler et al. (2019) for a review).  
119 Recently, sparse coding with non-negative constraint has been shown to provide an account for learning of  
120 the spatial and temporal properties of hippocampal place cells within the entorhinal-hippocampal network  
121 (Lian and Burkitt, 2021, 2022). In this study, non-negative sparse coding is used to learn the receptive field  
122 properties of EBCs found in the RSC.

### 123 **2.2.2 Model structures**

124 As the simulated animal runs freely in the 2D environment, an image representing what the animal sees is  
125 generated at every location. This image is used as the visual stimulus to the simulated animal. To explore  
126 where in the visual processing chain EBCs arise we investigate two models: (i) Raw Visual (RV) model, a  
127 control model that uses the raw visual data (model structure shown in Figure 2a), and (ii) V1-RSC model,  
128 a more biological model that uses the processed data corresponding to processing in the early visual system  
129 and processing in the V1 before projecting to the RSC (model structure shown in Figure 2b).

130 The learning principle used in both the RV and V1-RSC models is non-negative sparse coding. Given that  
131 the RV model is designed as a control model to investigate whether raw visual input can give rise to EBCs,  
132 while the V1-RSC model is a more biological model that incorporates visual processing in the early visual  
133 systems and V1, we use slightly different implementations of non-negative sparse coding. Specifically, the  
134 RV model uses a built-in function from the SciKit-Learn python package (Pedregosa et al., 2011) while the  
135 V1-RSC model uses the implementation from our previous work (Lian and Burkitt, 2021).

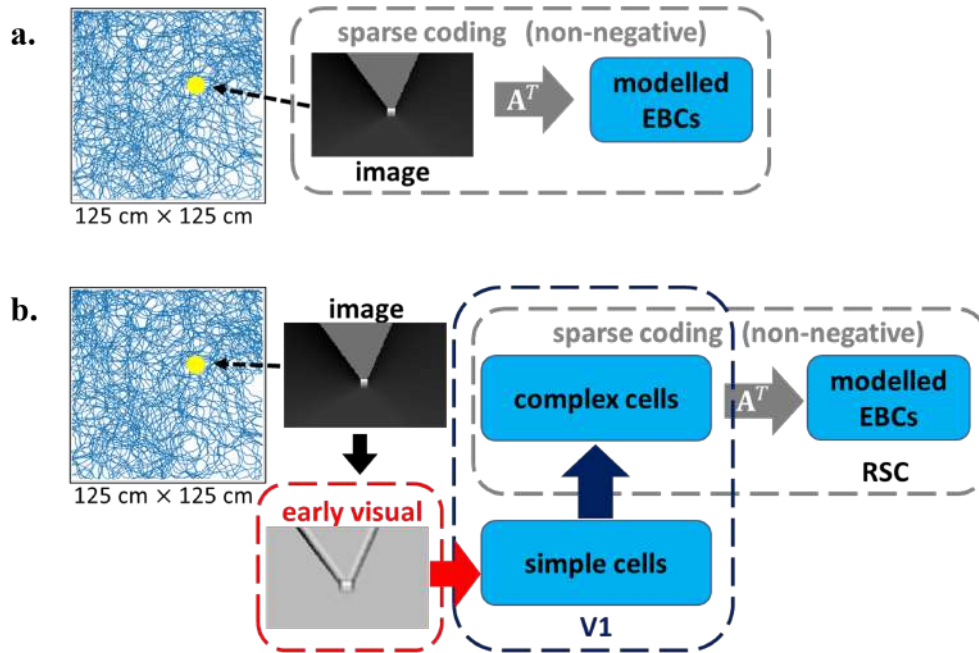

Figure 2: **Structures of Raw Visual (RV) model and V1-RSC model.** The simulated animal runs freely in the 1.25 m × 1.25 m simulated environment. The simulated visual scene the animal sees at different locations is the visual stimulus to the simulated animal. a) RV model: the raw visual input is directly used as the input to a network that implements non-negative sparse coding. b) V1-RSC model: the raw visual input is pre-processed by the early visual system and then projected to V1 that involves simple cell and then complex cell processing; complex cells in V1 then project to modelled EBCs in RSC and a V1-RSC network is implemented based on non-negative sparse coding (described in Equations 2 & 3).

### 136 2.2.3 Raw Visual model: using the raw visual data

137 In the RV model, the raw visual data is used as the input to the model, which is a  $40000 \times 18700$  matrix. This  
 138 contains the raw visual data ( $170 \times 110$ ) flattened for all 40000 time steps. One sample of raw visual input is  
 139 displayed as the embedded ‘image’ in Figure 2a. Non-negative sparse coding of this model is implemented  
 140 by applying non-negative matrix factorisation (Lee and Seung, 1999) with sparsity constraints using the  
 141 built-in function from the SciKit-Learn python package (Pedregosa et al., 2011). 100 dictionary elements  
 142 are generated, which we identify with the model neuron responses used in the V1-RSC model. Since the  
 143 simulated animal only has access to the visual data as it is running, training on the  $40000 \times 18700$  input  
 144 dataset is only performed for a single iteration to simulate the early stages of receptive field generation.

## 145 **2.2.4 V1-RSC model: using a more biological model from V1 to RSC**

146 **Early visual processing:** Processing in the early visual system describes the visual processing of the retinal  
147 ganglion cells (RGCs). In this study, this is done using divisively normalised difference-of-Gaussian filters  
148 that mimic the receptive fields of RGCs in the early visual system (Tadmor and Tolhurst, 2000; Ratliff et al.,  
149 2010). For any input image, the filtered image  $I$  at point  $(x, y)$  is given by

$$I(x, y) = \frac{I_c(x, y) - I_s(x, y)}{I_d(x, y)}, \quad (1)$$

150 where  $I_c$ ,  $I_s$ , and  $I_d$  are the response of the input image filtered by three unit-normalised Gaussian filters:  
151 center filter ( $G_c$ ), surround filter ( $G_s$ ), and divisive normalisation filter ( $G_d$ ).  $G_c - G_s$  implements the typical  
152 difference-of-Gaussian filter that characterises the center-surround receptive field of retinal ganglion cells  
153 and  $G_d$  describes the local adaptation of RGCs (Troy et al., 1993). The receptive field size of RGCs is set  
154 to  $9 \times 9$ . The standard deviations of  $G_c$ ,  $G_s$  and  $G_d$  are set to 1, 1.5 and 1.5, respectively (Borghuis et al.,  
155 2008). RGCs are located at each pixel point of the input image except these points that are within 4 pixels  
156 of the edges of the input image. For a given input image with size  $170 \times 110$ , the processed image after the  
157 early visual system has size  $162 \times 102$ . One sample of raw visual input and its corresponding processed  
158 input by the early visual system are displayed as the embedded ‘image’ and ‘early visual’ in Figure 2b.

159 **V1 processing:** Next, visual information processed by the early visual system projects to V1 and is further  
160 processed by simple cells and complex cells in V1 (Lian et al., 2019, 2021). The receptive field of a simple  
161 or complex cell is characterised by a  $13 \times 13$  image. Simple cells are described as Gabor filters with  
162 orientations spanning from  $0^\circ$  to  $150^\circ$  with step size of  $30^\circ$ , spatial frequencies spanning from 0.1 to 0.2  
163 cycles per pixel with step size of 0.025, and spatial phases of  $0^\circ$ ,  $90^\circ$ ,  $180^\circ$  and  $270^\circ$ . In addition, a complex  
164 cell receives input from 4 simple cells that have the same orientation and spatial frequency but different  
165 spatial phases (Movshon et al., 1978a,b; Carandini, 2006). Therefore, at each location of a receptive field,  
166 there are  $6 \times 5 \times 4 = 120$  simple cells and  $6 \times 5 = 30$  complex cells. As the receptive field only covers  
167 a small part of the visual field, the same simple cells and complex cells are repeated after every 5 pixels.  
168 Given that an input image from the early visual system has size  $162 \times 102$  and the size of a receptive field  
169 is  $13 \times 13$ , there are  $27 \times 20 = 540$  locations that have simple cells and complex cells. Overall, there are



170  $120 \times 540 = 64800$  simple cells and  $30 \times 540 = 16200$  complex cells in total. For a given visual stimulus  
171 with size  $170 \times 110$ , complex cell responses can be represented by a  $16200 \times 1$  vector. After the vision  
172 processing in V1, complex cell responses in V1 project to the RSC.

173 **Model dynamics:** Similar to our previous work (Lian and Burkitt, 2021, 2022), we implement the model  
174 via a locally competitive algorithm (Rozell et al., 2008) that efficiently solves sparse coding as follows:

$$\begin{aligned}\tau \dot{\mathbf{u}} &= -\mathbf{u} + \mathbf{A}^T \mathbf{I} - \mathbf{Y} \mathbf{s}, \\ \mathbf{s} &= \max(\mathbf{u} - \lambda, 0),\end{aligned}\tag{2}$$

175 and

$$\Delta \mathbf{A} = \eta (\mathbf{I} - \mathbf{A} \mathbf{s}) \mathbf{s}^T \text{ with } \mathbf{A} \geq 0,\tag{3}$$

176 where  $\mathbf{I}$  is the input from V1 (i.e., complex cells responses),  $\mathbf{s}$  represent the response (firing rate) of the  
177 model neurons in the RSC,  $\mathbf{u}$  can be interpreted as the corresponding membrane potential,  $\mathbf{A}$  is the matrix  
178 containing basis vectors and can be interpreted as the connection weights between complex cells in V1 and  
179 model neurons in the RSC,  $\mathbf{Y} = \mathbf{A}^T \mathbf{A} - \mathbb{1}$  and can be interpreted as the recurrent connection between model  
180 neurons in the RSC,  $\mathbb{1}$  is the identity matrix,  $\tau$  is the time constant of the model neurons in the RSC,  $\lambda$  is  
181 the positive sparsity constant that controls the threshold of firing, and  $\eta$  is the learning rate. Each column  
182 of  $\mathbf{A}$  is normalised to have length 1. Non-negativity of both  $\mathbf{s}$  and  $\mathbf{A}$  in Equations 2 & 3 is incorporated to  
183 implement non-negative sparse coding. Additional details about the above implementation of non-negative  
184 sparse coding can be found in Lian and Burkitt (2021).

185 **Training:** For the implementation of this model, there are 100 model RSC neurons and the parameters are  
186 given below. For the model dynamics and learning rule described in Equations 2 & 3,  $\tau$  is 10 ms,  $\lambda$  is 0, and  
187 the time step of implementing the model dynamics is 0.5 ms. The simulated visual input of the simulated  
188 trajectory that contains 40000 positions is used to train the model. Since the simulated trajectory is updated  
189 after every 30 ms, at each position of the trajectory, there are 60 iterations of computing the model response  
190 using Equation 2. After these 60 iterations, the learning rule in Equation 3 is applied such that connection  
191  $\mathbf{A}$  is updated. The animal then moves to the next position of the simulated trajectory. The learning rate  $\eta$  is  
192 set to 0.3 for the first 75% of the simulated trajectory and 0.03 for the final 25% of the simulated trajectory.

193 Note that the model with  $\lambda = 0$  implements non-negative matrix factorisation (Lee and Seung, 1999), which  
194 is a special variant of non-negative sparse coding. However, when  $\lambda$  is set to a positive value such as 0.1,  
195 the learnt EBCs display similar features, except that the neural response is sparser.

### 196 **2.3 Collecting model data**

197 After the RV model and V1-RSC model finish learning using simulated visual input sampled along the  
198 simulated trajectory, a testing trajectory with simulated visual input is used to collect model responses  
199 for further data analysis. The experimental trajectory of real rats from Alexander et al. (2020) is used  
200 as the testing trajectory and it contains movement direction as well as head direction. In addition, for the  
201 experimental trajectory, head direction is not necessarily identical to movement direction because the animal  
202 is not head-fixed in the experiment. Simulated visual input from the experimental trajectory is generated  
203 using the same approach described above, except that the camera is not facing front but aligned with the  
204 head direction from the experimental data. Both models are rate-based and thus the model responses are  
205 then transformed into spikes using a Poisson spike generator with a maximum firing rate 30 Hz for the whole  
206 modelled population.

207 Results displayed in the main text are generated using model data collected from an experimental trajectory  
208 that has different movement and head directions. However, results of model data collected from a simu-  
209 lated trajectory where head direction is aligned with movement direction are also given in Supplementary  
210 Materials.

### 211 **2.4 Experimental methods**

212 An electrophysiological dataset collected from the RSC of male rats performing random foraging in a  
213 1.25 m  $\times$  1.25 m arena was used from published prior work (Alexander et al., 2020) to make comparisons  
214 between model and experiment data of EBCs. For additional details relating to experimental data acquisi-  
215 tion see Alexander et al. (2020). In addition, the data analysis techniques from this experimental paper were  
216 used to analyze the data from the simulations.

## 217 **2.5 Data analysis**

### 218 **2.5.1 Two-dimensional (2D) spatial ratemaps and spatial stability**

219 The analysis of the neural activity in the simulation used the same techniques that were used to analyze pub-  
220 lished experimental data from the RSC (Alexander et al., 2020). Animal or simulation positional occupancy  
221 within an open field was discretized into 3 cm×3 cm spatial bins. For each model neuron, the raw firing  
222 rate for each spatial bin was calculated by dividing the number of spikes that occurred in a given bin by the  
223 amount of time the animal occupied that bin. Note that spiking in the model was generated by a Poisson  
224 spike generator. Raw firing ratemaps were smoothed with a 2D Gaussian kernel spanning 3 cm to generate  
225 final ratemaps for visualization.

### 226 **2.5.2 Construction of egocentric boundary ratemaps**

227 The analysis of egocentric boundary ratemaps (EBR) used the same techniques used for published experi-  
228 mental data (Alexander et al., 2020). EBRs were computed in a manner similar to 2D spatial ratemaps, but  
229 referenced relative to the animal rather than the spatial environment. The position of the boundaries relative  
230 to the animal was calculated for each position sample (i.e., frame). For each frame, we found the distance,  
231 in 2.5 cm bins, between arena boundaries and angles radiating from 0° to 360° in 3° bins relative to the  
232 animal's position. Angular bins were referenced to the head direction of the animal such that 0°/360° was  
233 always directly in front of the animal, 90° to its left, 180° directly behind it, and 270° to its right. Intersec-  
234 tions between each angle and environmental boundaries were only considered if the distance to intersection  
235 was less than or equal to half the length to the most distant possible boundary (in most cases this threshold  
236 was set at 62.5 cm or half the width of the arena to avoid ambiguity about the influence of opposite walls).  
237 In any frame, the animal occupied a specific distance and angle relative to multiple locations along the arena  
238 boundaries, and accordingly, for each frame, the presence of multiple boundary locations were added to  
239 multiple 3° × 2.5 cm bins in the egocentric boundary occupancy map. The same process was completed  
240 with the locations of individual spikes from each model neuron, and an EBR was constructed by dividing  
241 the number of spikes in each 3° × 2.5 cm bin by the amount of time that bin was occupied in seconds.  
242 Smoothed EBRs were calculated by convolving each raw EBR with a 2D Gaussian kernel (5 bin width, 5  
243 bin standard deviation).

### 244 2.5.3 Identification of neurons with egocentric boundary vector tuning

245 The identification of model neurons with significant egocentric boundary vector sensitivity used the same  
246 criteria for identification of real neurons showing this response (Alexander et al., 2020). The mean resul-  
247 tant,  $\bar{R}$ , of the cell's egocentric boundary directional firing, collapsed across distance to the boundary, was  
248 calculated as

$$\bar{R} = \left( \frac{1}{nm} \sum_{\theta=1}^n \sum_{D=1}^m F_{\theta,D} e^{i\theta} \right), \quad (4)$$

249 where  $\theta$  is the orientation relative to the rat,  $D$  is the distance from the rat,  $F_{\theta,D}$  is the firing rate in a given  
250 orientation-by-distance bin,  $n$  is the number of orientation bins, and  $m$  is the number of distance bins. The  
251 mean resultant length (MRL),  $\bar{L}$ , is defined as the absolute value of the mean resultant and characterized the  
252 strength of egocentric bearing tuning to environment boundaries. The preferred orientation of the egocentric  
253 boundary ratemap was calculated as the mean resultant angle (MRA),  $\bar{\phi}$ ,

$$\bar{\phi} = \arctan \left( \frac{\Im(\bar{R})}{\Re(\bar{R})} \right), \quad (5)$$

254 where  $\Im$  and  $\Re$  are the real and imaginary parts of their arguments respectively.

255 The preferred distance was estimated by fitting a Weibull distribution to the firing rate vector corresponding  
256 to the MRA and finding the distance bin with the maximum firing rate. The MRL, MRA, and preferred  
257 distance were calculated for each model neuron for the two halves of the experimental session independently.

258 A model neuron was characterized as having egocentric boundary vector tuning (i.e., an EBC) if it reached  
259 the following criteria: 1) the MRL from both session halves were greater than the 99th percentile of the  
260 randomized distribution taken from Alexander et al. (2020) ( $\bar{L} > 0.14$ ), 2) the absolute circular distance in  
261 preferred angle between the 1st and 2nd halves of the baseline session was less than  $45^\circ$ , and 3) the change  
262 in preferred distance for both the 1st and 2nd halves relative to the full session was less than 50%. To refine  
263 our estimate of the preferred orientation and preferred distance of each model neuron we calculated the  
264 center of mass (COM) of the receptive field defined after thresholding the entire EBR at 75% of the peak  
265 firing and finding the largest continuous contour ('contour' in Matlab). We repeated the same process for  
266 the inverse EBR for all cells to identify both an excitatory and inhibitory receptive field and corresponding

267 preferred orientation and distance for each model neuron.

#### 268 **2.5.4 Von Mises mixture models**

269 Distribution of preferred orientation estimates was modeled as mixtures of Von Mises distributions using  
270 orders from 1 to 5 (“fitmvmdist” found at <https://github.com/chrschy/mvmdist>). Optimal  
271 models were identified as the simplest model increasing model fit by 10% over the one-component model.  
272 Theta of each Von Mises component is reported, and a distribution function of the optimal model was  
273 generated to visualize mixture model fit.

### 274 **3 Results**

#### 275 **3.1 Learnt EBCs are similar to those found in the experimental study**

##### 276 **3.1.1 Results using Raw Visual model**

277 100 dictionary elements (model cells) of the RV model were trained on a simulated trajectory and then  
278 tested on the experimental trajectory as described in Section 2.3. 38% of these model cells possessed  
279 significant and reliable sensitivity to the egocentric bearing and distance to environmental boundaries. A  
280 similar but lightly larger percentage was observed when these model cells were tested on the simulated  
281 trajectory (41%). Figure 3 shows six examples of learnt cells that are proximal, distal and inverse EBCs.  
282 Plots of the full set of 100 RV model cells tested using experimental and simulated animal trajectories are  
283 given in the Supplementary Materials A.1 & A.2.

##### 284 **3.1.2 Results using V1-RSC model**

285 100 model cells of the V1-RSC model were also trained using on a simulated trajectory and then tested on  
286 the experimental trajectory, as described in Section 2.3. Of these cells, 85% possessed significant egocentric  
287 boundary vector sensitivity when tested on the real animal trajectory and a similar percentage was observed  
288 on the simulated trajectory (90%). Twelve examples showing the activity of cells with learned EBC receptive  
289 fields on the experimental trajectory are displayed in Figure 4. The four sets of plots in Figure 4a depict  
290 representative examples of proximal EBCs with different preferences for egocentric orientation, and the four

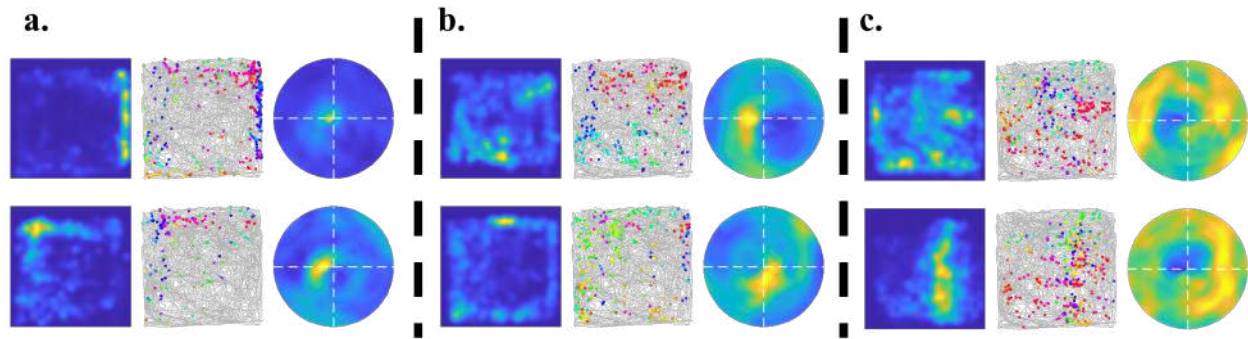

Figure 3: **Examples of learnt EBCs recovered using experimental trajectory: Raw Visual model.** Similar to Figure 1, each row with three images shows the spatial ratemap, firing plot with head directions and egocentric ratemap. **a)** Proximal EBCs, **b)** Distal EBCs, and **c)** Inverse EBCs with different preferences of egocentric orientation.

291 sets of plots in Figure 4b show representative examples of distal EBCs, also showing different preferences for  
292 egocentric orientation. The four sets of plots in Figure 4c show examples of learned inverse EBCs. Each row  
293 consists of EBCs with similar orientations. These examples illustrate that they code for different orientations  
294 and distances in the animal-centered framework. Plots of the full set of 100 V1-RSC model cells generated  
295 using experimental and simulated animal trajectories are given in the Supplementary Materials A.3 & A.4.  
296 These result show that, after training, the learnt RSC cells exhibit diverse egocentric tuning similar to that  
297 observed in experimental data (Alexander et al., 2020), including the three different types identified ex-  
298 perimentally: proximal, distal and inverse. The results likewise show that the cells are activated by walls  
299 at different orientations in the egocentric framework. In other words, this model learns diverse egocentric  
300 vector coding; namely the learnt cells code for boundaries at different orientations and distances.

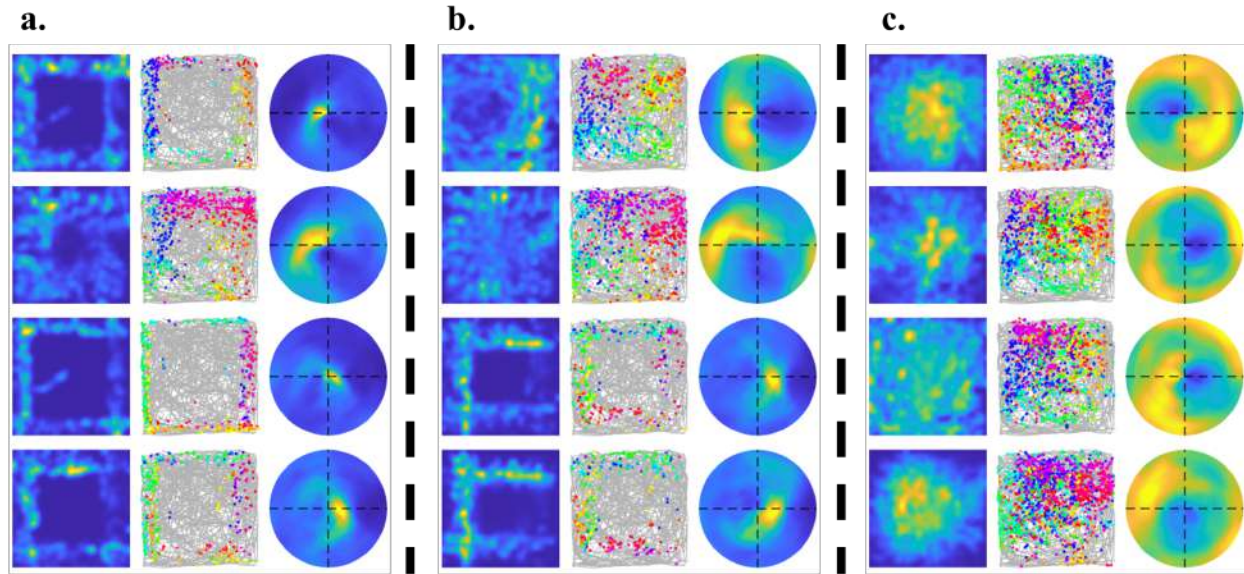

Figure 4: **Examples of learnt EBCs recovered using experimental trajectory: V1-RSC model.** Similar to Figure 1, each row with three images shows the spatial ratemap, firing plot with head directions and egocentric ratemap. **a)** Proximal EBCs, **b)** Distal EBCs, and **c)** Inverse EBCs with different preferences of egocentric orientation.

### 301 **3.1.3 Population statistics of EBC orientation and distance**

302 The EBCs that are learnt using RV model and V1-RSC model, illustrated in Figures 3 & 4, show considerable  
303 similarity to those found in experimental studies (Alexander et al., 2020). After the model is trained on  
304 simulated visual data sampled from a virtual environment with a simulated trajectory, model responses are  
305 collected with both experimental trajectory (where head direction is not necessarily aligned with moving  
306 direction) and simulated trajectory (where head direction is the same as moving direction), see “Collecting  
307 model data” of “Materials and Methods” for details. Then the egocentric tuning properties of all the model  
308 cells are investigated using the technique in “Data analysis” of “Materials and Methods”.

309 A summary of percentages of cells that are classified as EBCs for both experimental and model data is dis-  
310 played in Table 1. Alexander et al. (2020) reported 24.1% (n=134/555) EBCs in the experimental data. RV  
311 model has 41% (n=41/100) and 38% (n=38/100) EBCs recovered by simulated trajectory and experimental  
312 trajectory, respectively. V1-RSC model has 90% (n=90/100) and 85% (n=85/100) EBCs recovered by sim-  
313 ulated trajectory and experimental trajectory, respectively. Above all, our proposed model is successful in

314 learning EBCs from visual input.

Table 1: Percentages of EBCs of experimental and model data.

|     | Experimental     | Raw Visual model |               | V1-RSC model  |               |
|-----|------------------|------------------|---------------|---------------|---------------|
|     |                  | Sim. traj.       | Exp. traj.    | Sim. traj.    | Exp. traj.    |
| EBC | 24.1%, n=134/555 | 41%, n = 41/100  | 38%, n=38/100 | 90%, n=90/100 | 85%, n=85/100 |

315 The extent of the similarity between experimental and model data is shown in Figure 5, which demonstrates  
316 that both RV and V1-RSC models generate EBCs whose characteristics resemble experimentally observed  
317 data on a population level. Thus, visual input alone may give rise to EBC-like receptive fields. The vector  
318 coding of an EBC indicates the coding of orientation and distance. Experimental data (left of Figure 5) shows  
319 that EBCs in the RSC have a lateral preference for orientation and a wide range of distance tuning. Learnt  
320 EBCs of both the RV model and V1-RSC model have qualitatively similar distributions to the experimental  
321 data of both preferred bearing and distance. That said, the distribution of preferred orientations and distances  
322 in the experimental dataset significantly differed from EBCs in the V1-RSC (Kuiper test for differences in  
323 preferred orientation;  $k = 3443$ ;  $p = 0.002$ ; Wilcoxon ranksum test for differences in preferred distance;  $p =$   
324  $0.03$ ) but not the RV model (Kuiper test for preferred orientation;  $k = 1644$ ;  $p = 0.05$ ; Wilcoxon ranksum test  
325 for preferred distance;  $p = 0.49$ ). These differences partly arise from 1) an overall lack of V1-RSC EBCs  
326 with preferred egocentric orientations in front of or behind the animal and 2) a more uniform distribution of  
327 preferred distances with lower concentration in the proximal range for V1-RSC model EBCs.

328 Different visual inputs imply different spatial information about the animals' position, so salient visual  
329 features may correlate with spatial tuning properties of neurons. By solely taking visual input, the model  
330 based on sparse coding promotes diverse tuning properties (different types of EBCs and diverse population  
331 responses) because of the inherent competition of the model. Difference between experimental and model  
332 data is discussed further in the Discussion Section 4.2 & 4.4.

### 333 **3.2 Learnt EBCs generalize to novel environments**

334 EBCs are experimentally observed to exhibit consistent tuning preferences across environments of different  
335 shapes or sizes (LaChance et al., 2019; Alexander et al., 2020). We next examined whether learnt EBCs of  
336 the two models exhibited similar characteristics. To do so, we exposed model units that were trained on the



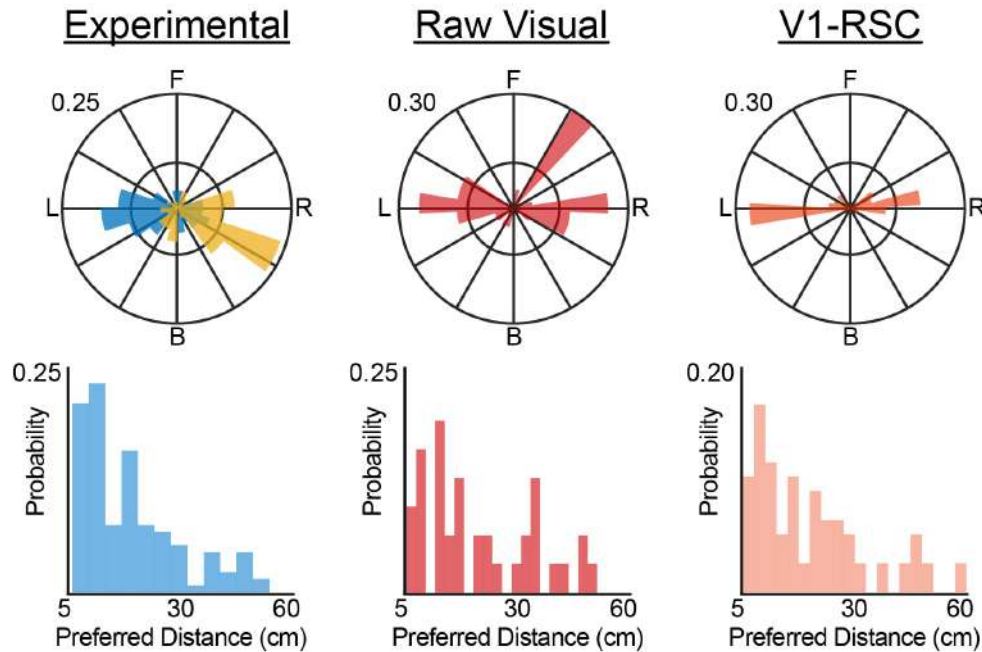

Figure 5: **Population statistics of experimental and model data.** Distributions of orientation (top row) and distance (bottom row) in the Raw Visual model (middle column) and V1-RSC model (right column) resemble experimental distributions observed in RSC (Alexander et al., 2020) (left column; blue and yellow histograms correspond to real neurons recorded in the right and left hemispheres, respectively). Model data in this figure is collected using experimental trajectory.

337 baseline (1.25m<sup>2</sup>) session to both a circular and expanded (2m<sup>2</sup>) novel environments.

338 We observed many learnt units that continued to exhibit egocentric receptive fields across environments  
339 (Figure 6a-e). However, there were notable differences in the preferred egocentric bearing and distances of  
340 the receptive fields of individual units as well as the generalizability of tuning across environments between  
341 the unprocessed (RV) and feature processed (V1-RSC) models. The RV model tended to have greater  
342 turnover of units with EBC-like properties between the baseline, circle, and expanded arenas while the  
343 population of EBCs in the V1-RSC model overlapped substantially between environments (e.g., only 1 RSC-  
344 V1 unit was an EBC solely in the baseline session; Figure 6f). Interestingly, both models exhibited more  
345 robust egocentric bearing tuning in circular when compared to square environments (Figure 6g; Kruskal-  
346 Wallis test w/ post-hoc Tukey-Kramer; RV  $\chi^2 = 42.3$ ; V1-RSC  $\chi^2 = 63.5$ ; both  $p < 0.001$ ). Consistent

347 with this observation, RV model units were more likely to exhibit EBC-like tuning in circular environments  
348 (Figure 6b,f) while V1-RSC model units showed no preference for environment shape (Figure 6f).

349 The RV and V1-RSC models also diverged when examining the properties of egocentric boundary tuning  
350 curves across environments. While there were fewer preserved EBC units in the RV model across sessions,  
351 those that did maintain EBC-like tuning tended to have the similar preferred orientations between baseline,  
352 circular, and expanded arenas (Figure 6h, left column; Kuiper test for different preferred orientations;  $k_{\text{circle}}$   
353 = 270;  $k_{2m} = 144$ ; both  $p = 1$ ). In contrast, V1-RSC units had significant differences at the population level  
354 in preferred orientations between the circular environment and baseline session (Figure 6h, top right; Kuiper  
355 test;  $k_{\text{circle}} = 1334$ ;  $p = 0.001$ ). This likely arose from subsets of V1-RSC units that exhibited movement of  
356 their preferred egocentric bearing to the contralateral side of the agent between arenas (Figure 6d,h). V1-  
357 RSC units were extremely reliable in their preferred orientation within both sized square arenas, indicating  
358 that the egocentric receptive fields in this model were highly sensitive to environmental geometry (Figure 6h,  
359 bottom right; Kuiper test;  $k_{2m} = 1105$ ;  $p = 1$ ). In fact, small numbers of V1-RSC units with EBC-like  
360 tuning in square environments exhibited a complete disruption of egocentric receptive fields in circular  
361 environments consistent with experimental observations (Figure 6e; A.S. Alexander, unpublished).

362 Larger alterations to EBC receptive fields across environments were observed for the distance component  
363 in both models. Many units exhibited drastic changes to their preferred egocentric distance with a bias  
364 towards a shift further from the animal (Figure 6h;  $\Delta\text{Pref Dist.} = \text{PD}_{\text{baseline}} - \text{PD}_{\text{manip}}$ ; Signed rank test for  
365 0 median differences; all conditions and models  $p < 0.05$ ). This observation was especially apparent in the  
366 V1-RSC model and, in particular, in the arena expansion manipulation (Figure 6h, bottom right). In the  $2m^2$   
367 environment, shifts in preferred distances that moved receptive fields further away from the animal could  
368 indicate that subsets of EBCs anchored their activity to the center of the environment rather than boundaries,  
369 as reported in postrhinal cortices (Figure 6d; [LaChance et al. 2019](#)). These simulations indicate that, in a  
370 manner consistent with experimentally observed EBCs, most model-derived units exhibit consistent EBC-  
371 like tuning between environments of different shapes and sizes.

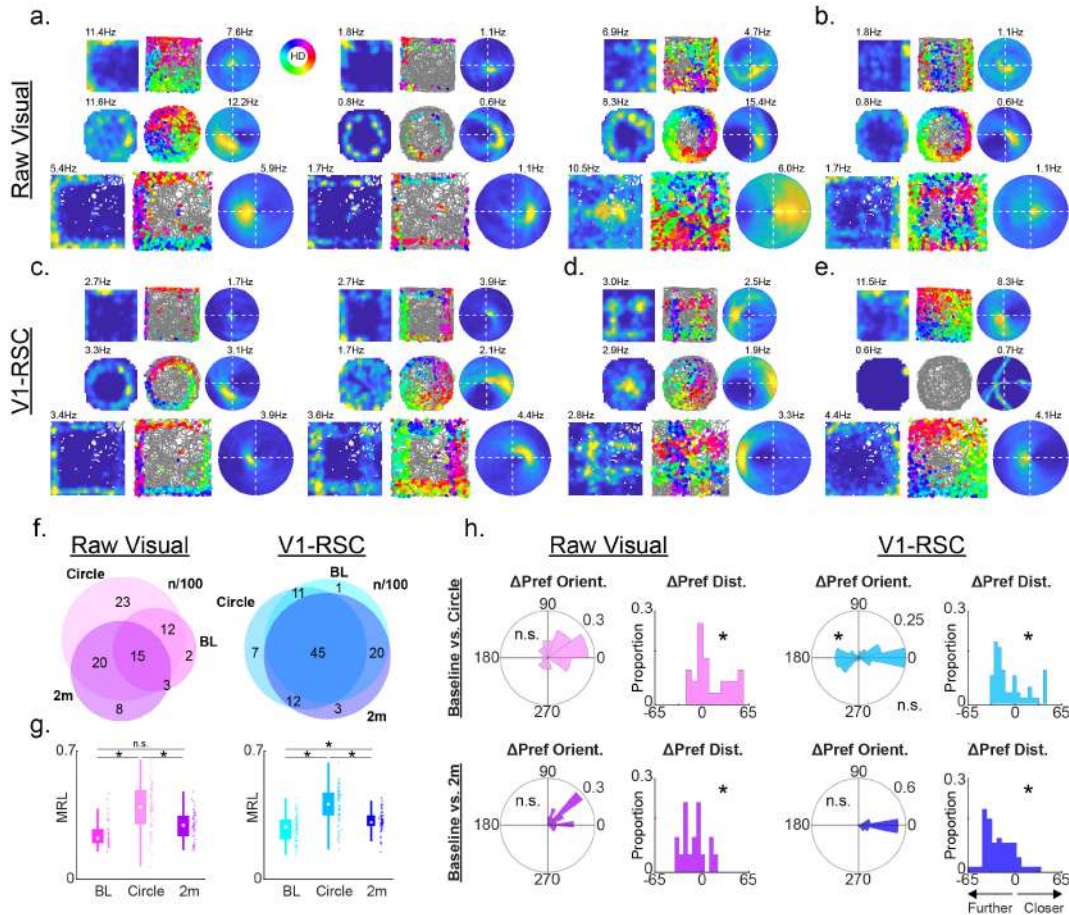

**Figure 6: Model EBCs exhibit mostly consistent tuning when the environment is manipulated.** **a)** 3 examples of EBCs in the Raw Visual (RV) model across baseline ( $1.25\text{m}^2$ ), circular, and expanded ( $2\text{m}^2$ ) environments. Left plots, firing ratemap as a function of position of the agent. Middle plots, trajectory plot showing agent path in gray and position at time of spiking as colored circles. Color indicates heading at the time of the spike as indicated in the legend. Right plots, egocentric boundary ratemap. **b)** RV unit with EBC coding in circular but not square environments. **c)** 2 examples of EBCs in the V1-RSC model across baseline ( $1.25\text{m}^2$ ), circular, and expanded ( $2\text{m}^2$ ) environments. Plots as in **a**. **d)** V1-RSC unit that has contralateral orientation tuning between square and circular environments. **e)** V1-RSC unit that loses an EBC receptive field when moving from square to circular environments. **f)** Venn diagrams for RV (left) and V1-RSC (right) EBCs across all simulated arenas. Overlaps indicate units with EBC tuning in multiple arenas. Numbers indicate total count out of 100 simulated units. BL, baseline ( $1.25\text{m}^2$ ); Circle, circular; 2m, expansion ( $2\text{m}^2$ ). **g)** Scatter plots of mean resultant length (MRL) for detected EBCs in each environment. Abbreviations as in **f**. **h)** Changes to preferred orientation and distance in RV and V1-RSC model EBC units between baseline and manipulation sessions. Rows are ‘baseline versus circle’ (top) or ‘baseline versus 2 meter’ (bottom) comparisons. Left four plots, RV model with polar plots depicting change to preferred orientation ( $\Delta\text{Pref Orient.} = \text{PO}_{\text{baseline}} - \text{PO}_{\text{manip}}$ ) and histograms depicting change to preferred distance ( $\Delta\text{Pref Dist.} = \text{PD}_{\text{baseline}} - \text{PD}_{\text{manip}}$ ). Radial and y-axes are the proportion of units with EBC-like tuning in both conditions. Negative values on the right histograms indicate receptive fields moving farther from the animal, vice versa for positive values. Right four plots, same as left plots but for the V1-RSC model.

### 372 **3.3 The width of visual field affects the orientation distribution of learnt EBCs**

373 The preferred egocentric bearings of EBCs from both experimental data and model simulations are concen-  
374 trated at lateral angles (Figure 5) and overlap significantly with the facing direction of the eyes. Thus, it  
375 is possible that the distribution of EBC-preferred bearings reflects the visual field of the animal. We next  
376 examined model EBC receptive field properties in simulations of agents possessing varying fields of view  
377 (FOV, Figure 7). Consistent with this hypothesis, the distribution of preferred bearings is primarily for-  
378 ward facing in simulations with convergent FOVs and spread in more lateral orientations as the visual field  
379 approaches a more naturalistic width. Indeed, at a 170° width field of view, the distribution of preferred  
380 orientations becomes bimodal in both models with mean angular preferences of each mode falling near  
381 0/360° and 180° as observed in experimental data (Figure 5). Accordingly, the combination of visual sparse  
382 coding and physical constraints on animal visual fields may define core properties of EBC receptive fields  
383 and enable the prediction of preferred bearings in other species.

384 Furthermore, Figure 7 shows that both models generate more behind-animal EBCs when FOVs are small  
385 (60°, 90° and 120°). Given that there is no mnemonic component in the model and the wall behind the  
386 animal is completely out of its view when FOV is small, the result here suggests that the model based on  
387 sparse coding promotes the diversity of EBC tuning properties even though only visual input is used.

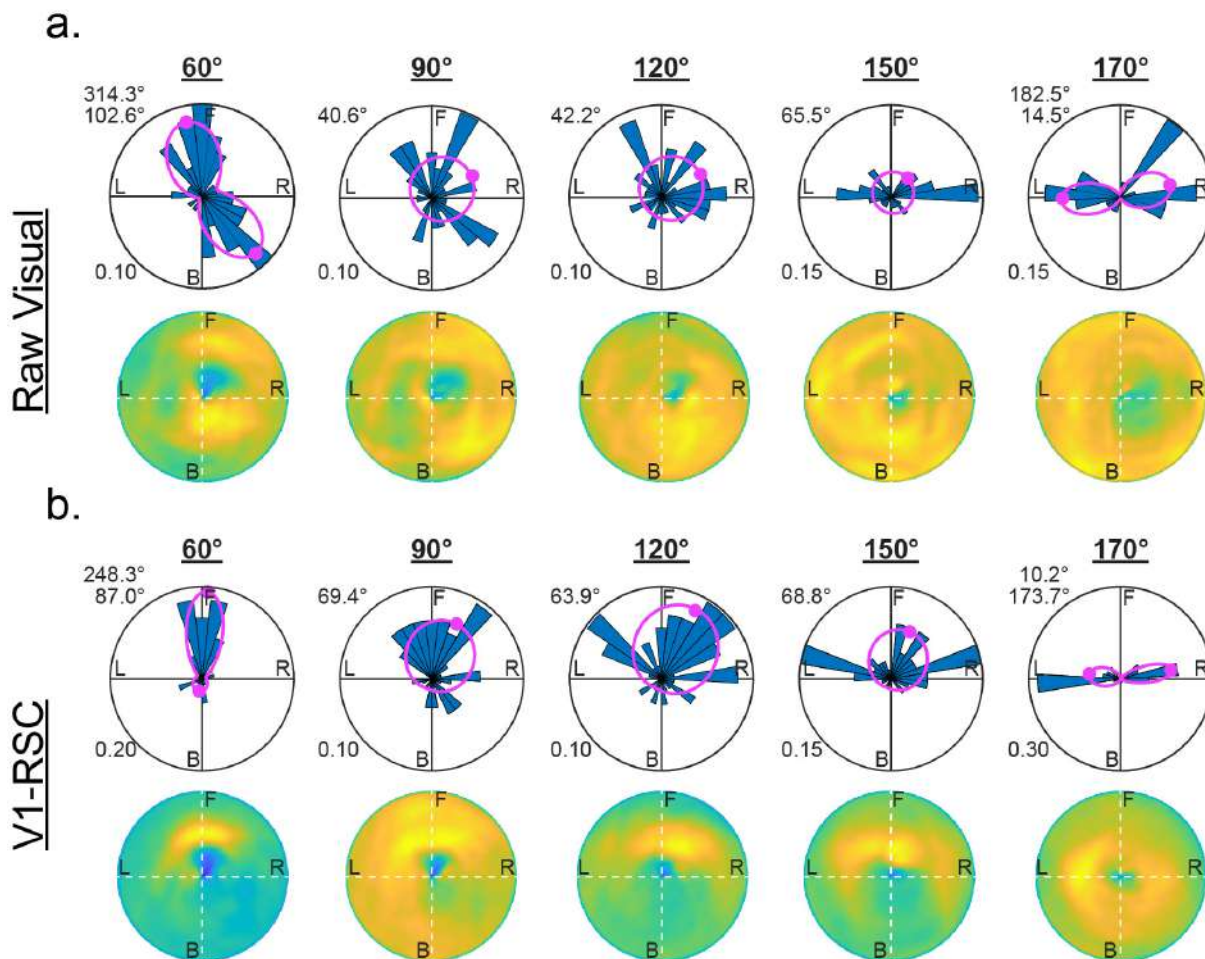

Figure 7: **EBC preferred bearings as a function of field of view.** **a)** Top row, distribution of preferred egocentric bearings for EBCs in the Raw Visual model as a function of width of field of view. Preferred bearings move from forward to lateral facing as the visual field increases in width. Pink traces, Von Mises Mixture model fits of preferred bearing distribution with mean angles depicted and indicated on top left. Bottom row, mean egocentric boundary ratemaps across all EBCs identified for each simulation. Blue to yellow, zero to maximal activity. **b)** Same as in **a**, but for the V1-RSC model.

## 388 4 Discussion

### 389 4.1 Summary of key results

390 In this study, the results of two different learning models for RSC cell responses are compared with experi-  
 391 mental RSC cell data. Both models take visual images as the input, using trajectories of the environment that  
 392 are either measured experimentally or simulated. The Raw Visual (RV) model takes the raw visual images as

393 the input, while the V1-RSC model incorporates visual information processing associated with simple and  
394 complex cells of the primary visual cortex (Lian et al., 2019, 2021). After learning, both models generate  
395 EBCs that are proximal, distal and inverse, similar to experimentally observed EBCs in the RSC (Alexander  
396 et al., 2020). Moreover, the learnt EBCs have similar distributions of orientation and distance coding to the  
397 distributions measured in experimental data. The learnt EBCs also show some extent of generalization to  
398 novel environments, consistent with the experimental study (Alexander et al., 2020). Furthermore, as the  
399 field of view of visual input increases, the orientation distribution of learnt EBCs becomes more lateral.  
400 Overall, our results suggest that a simple model based on sparse coding that takes visual input alone can  
401 account for the emergence and properties of a special type of spatial cells in the navigational system of the  
402 brain - egocentric boundary cells (EBCs). For another recent model that describes the learning of EBCs, see  
403 Uria et al. (2022). In the future, this framework can also be used to understand how other visual input (such  
404 as landmarks, objects, etc.) affects the firing of spatially-coded neurons, as well as how other sensory input  
405 contributes to the tuning properties of some neurons in the navigational system.

## 406 **4.2 Comparison between experimental and model data**

407 Though the model data indicates that both models can learn EBCs similar to experimental ones and the  
408 population statistics of orientation and distance coding resembles experimental data, there are still some im-  
409 portant differences between model and experimental data that can shed light on the mechanisms associated  
410 with EBC responses.

411 Experimental data shows that the orientation distribution is more skewed towards the back, while the dis-  
412 tributions of model data are more lateral (see Figure 5). There are many more behind-animal EBCs in the  
413 experimental study compared with the model data when the field of view is  $170^\circ$  (Figure 5, but we found that  
414 our model can generate more behind-animal EBCs when the field of view is as narrow as  $60^\circ$  (see Figure 7,  
415 suggesting that the competition brought by sparse coding promotes diverse EBC tunings solely based on vi-  
416 sual input without any mnemonic component. The difference of population responses among experimental  
417 data, RV model data, and V1-RSC model data seems to indicate that a major source of these differences is  
418 the extent to which the modelled visual input corresponds to that in the visual system. Whether more bio-  
419 physically accurate simulated visual input could further reduce these differences is discussed in Section 4.3

420 & 4.4.

421 Additionally, there is still a substantial difference in how cells respond in the vicinity of corners of the  
422 environment. In simulation, the allocentric ratemaps of some learnt EBCs show overlapping #-like wall re-  
423 sponses (see the bottom two examples in Figure 4b and examples in Supplementary Materials A.5), whereas  
424 the experimental data seems to “cut off” the segments of #-like response close to the corner. Our models  
425 only use visual input while the real animal integrates a variety of different sensory modalities into spatial  
426 coding. We infer that the integration of information from different sensory modalities could be responsible  
427 for cutting off the overlapping wall responses.

428 The percentage of EBCs for different data sets also differ, as seen from Table 1. The overall percentage of  
429 EBCs was lower in the experimental data than in both types of simulations. This likely arises from the focus  
430 of the simulations on coding of static visual input stimuli across a range of different positions and directions  
431 in the environment. Though the cells created by this focused simulation show striking similarity to real  
432 data, the retrosplenial cortex is clearly involved in additional dimensions of behavior, such as the learning of  
433 specific trajectories and associations with specific landmarks. Previous recordings show that neurons in the  
434 retrosplenial cortex code additional features such as the position along a trajectory through the environment  
435 (Alexander and Nitz, 2015, 2017; Mao et al., 2018, 2020) and the relationship of landmarks to head direction  
436 (Jacob et al., 2017; Lozano et al., 2017; Fischer et al., 2020). Human functional imaging also demonstrates  
437 coding of position along a trajectory (Chrastil et al., 2015), as well as the relationship of spatial landmarks  
438 to specific memories (Epstein et al., 2007). The neuronal populations involved in these additional functions  
439 of retrosplenial cortex are not included in the model, which could account for the EBCs making up a larger  
440 percentage of the model neurons in the simulations.

### 441 **4.3 Rat vision processing**

442 Rats have very different vision from humans, in part because their eyes are positioned on the side of their  
443 head, whereas human’s eyes are facing front. Consequently rats have a wide visual field and a strong lateral  
444 vision. In this study, rat vision is simulated by a camera with a 170° horizontal view and 110° vertical view,  
445 except for the results in Section 3.3. In Section 3.3, when different horizontal fields of view are used, we  
446 found that the model can generate more behind-animal EBCs with smaller field of view and the orientation

447 becomes more lateralized as the field of view increases. Though the view angle of  $170^\circ$  is wider compared  
448 with human vision, the simulated vision might not be as lateral as in real rats. Due to the built-in limitations  
449 of the Panda3D game engine used to simulate the visual input, we were unable to generate visual input  
450 at degrees more lateral than the 170 degree range used here. Additionally, real rats have binocular vision  
451 instead of a monocular vision simulated in this study. This will be investigated in future studies, in which the  
452 rat vision will be mimicked by simulating visual input using two laterally positioned cameras. As a more  
453 biophysically accurate simulated visual input is used, we infer that this could further reduce differences  
454 between model and experimental data, including generating more behind-animal EBCs when the field of  
455 view is large.

#### 456 **4.4 Differences between Raw Visual model and V1-RSC model**

457 Both the RV and V1-RSC models take the visual input and generate EBC responses using learning methods  
458 based on the principle of sparse coding. However, there are significant differences between the two models.  
459 The RV model takes the raw image as the input while the V1-RSC model incorporates vision processing  
460 similar to that of the brain that detects lines or edges in the visual input. In other words, the RV model learns  
461 cells based on the individual pixel intensities while the V1-RSC model learns cells based on the existence of  
462 visual features such as lines or edges. Because the environment consists of three black walls and one white  
463 wall, this difference may result in the white wall affecting the RV model more than the V1-RSC model. In  
464 particular, this could explain why the learnt EBCs of the V1-RSC model tend to be more omnidirectional in  
465 their firing for all four walls compared with the RV model (see examples of both models in Supplementary  
466 Materials), which may be related to the role of RSC as the egocentric-alloentric “transformation circuit”  
467 proposed by [Byrne et al. \(2007\)](#) and [Bicanski and Burgess \(2018\)](#) that transforms upstream egocentric  
468 sensory responses (vision in this paper) into downstream allocentric spatial cells. Another difference lies  
469 in the percentage of learnt EBCs between two models, where the V1-RSC model learns more EBCs (see  
470 “Comparison between experimental and model data”, Section 4.2, above). We infer that this difference also  
471 originates from the different visual input processing carried out in the models. Geometries (lines or edges)  
472 seem to be important for the EBCs firing, so the ability to detect such features in the V1-RSC model may help  
473 the model learn more EBCs. In addition, the RV model shows more diverse tuning properties of learnt EBC



474 population than the V1-RSC model (see Figure 5), while the V1-RSC model shows better generalization  
475 to novel environments (see Figure 6), likely caused by the V1 pre-processing of the model. Differences  
476 between the responses in the two models also point to the effect that the processing of visual input carried  
477 out in the early visual pathway (retina to primary visual cortex) has upon RSC cell responses (Lian et al.,  
478 2019, 2021). Since the V1-RSC model is a better model of rat's vision processing system, we infer that  
479 its model EBCs will be more similar to EBCs in the brain (also see Section 4.3, above). Furthermore, the  
480 model will better account for experimental data as a more biophysically accurate simulated visual input is  
481 used.

## 482 **Code Availability**

483 The code of implementing the model is made available at [https://github.com/yanbolian/  
484 Learning-EBCs-from-Visual-Input](https://github.com/yanbolian/Learning-EBCs-from-Visual-Input).

## 485 **References**

- 486 Alexander AS, Carstensen LC, Hinman JR, Raudies F, Chapman GW, Hasselmo ME (2020) Egocentric  
487 boundary vector tuning of the retrosplenial cortex. *Sci. Adv.* 6:eaaz2322.
- 488 Alexander AS, Nitz DA (2015) Retrosplenial cortex maps the conjunction of internal and external spaces.  
489 *Nat. Neurosci.* 18:1143–1151.
- 490 Alexander AS, Nitz DA (2017) Spatially periodic activation patterns of retrosplenial cortex encode route  
491 sub-spaces and distance traveled. *Curr. Biol.* 27:1551–1560.
- 492 Beyeler M, Rounds EL, Carlson KD, Dutt N, Krichmar JL (2019) Neural correlates of sparse coding and  
493 dimensionality reduction. *PLoS Comput. Biol.* 15:e1006908.
- 494 Bicanski A, Burgess N (2018) A neural-level model of spatial memory and imagery. *eLife* 7:e33752.
- 495 Bicanski A, Burgess N (2020) Neuronal vector coding in spatial cognition. *Nat. Rev. Neurosci.* 21:453–470.

- 496 Borghuis B, Ratliff C, Smith R, Sterling P, Balasubramanian V (2008) Design of a neuronal array. *J.*  
497 *Neurosci.* 28:3178–3189.
- 498 Byrne P, Becker S, Burgess N (2007) Remembering the past and imagining the future: a neural model of  
499 spatial memory and imagery. *Psychol. Rev.* 114:340.
- 500 Carandini M (2006) What simple and complex cells compute. *J. Physiol.* 577:463–466.
- 501 Chrastil ER, Sherrill KR, Hasselmo ME, Stern CE (2015) There and back again: hippocampus and retros-  
502 plenial cortex track homing distance during human path integration. *J. Neurosci.* 35:15442–15452.
- 503 Epstein RA, Parker WE, Feiler AM (2007) Where am I now? Distinct roles for parahippocampal and  
504 retrosplenial cortices in place recognition. *J. Neurosci.* 27:6141–6149.
- 505 Fischer LF, Soto-Albors RM, Buck F, Harnett MT (2020) Representation of visual landmarks in retrosplenial  
506 cortex. *eLife* 9:e51458.
- 507 Gofman X, Tocker G, Weiss S, Boccara CN, Lu L, Moser MB, Moser EI, Morris G, Derdikman D (2019)  
508 Dissociation between postrhinal cortex and downstream parahippocampal regions in the representation of  
509 egocentric boundaries. *Curr. Biol.* 29:2751–2757.
- 510 Hafting T, Fyhn M, Molden S, Moser MB, Moser EI (2005) Microstructure of a spatial map in the entorhinal  
511 cortex. *Nature* 436:801–806.
- 512 Hinman JR, Brandon MP, Climer JR, Chapman GW, Hasselmo ME (2016) Multiple running speed signals  
513 in medial entorhinal cortex. *Neuron* 91:666–679.
- 514 Hinman JR, Chapman GW, Hasselmo ME (2019) Neuronal representation of environmental boundaries in  
515 egocentric coordinates. *Nat. Commun.* 10:1–8.
- 516 Hoyer PO (2003) Modeling receptive fields with non-negative sparse coding. *Neurocomputing* 52:547–552.
- 517 Jacob PY, Casali G, Spieser L, Page H, Overington D, Jeffery K (2017) An independent, landmark-  
518 dominated head-direction signal in dysgranular retrosplenial cortex. *Nat. Neurosci.* 20:173–175.

- 519 Kropff E, Carmichael JE, Moser MB, Moser EI (2015) Speed cells in the medial entorhinal cortex. *Nature* 523:419–424.
- 520
- 521 LaChance PA, Todd TP, Taube JS (2019) A sense of space in postrhinal cortex. *Science* 365:eaax4192.
- 522 Lee DD, Seung HS (1999) Learning the parts of objects by non-negative matrix factorization. *Nature* 401:788–791.
- 523
- 524 Lever C, Burton S, Jeevjee A, O’Keefe J, Burgess N (2009) Boundary vector cells in the subiculum of the hippocampal formation. *J. Neurosci.* 29:9771–9777.
- 525
- 526 Lian Y, Almasi A, Grayden DB, Kameneva T, Burkitt AN, Meffin H (2021) Learning receptive field properties of complex cells in V1. *PLoS Comput. Biol.* 17:e1007957.
- 527
- 528 Lian Y, Burkitt AN (2021) Learning an efficient hippocampal place map from entorhinal inputs using non-negative sparse coding. *eNeuro* 8:1–19.
- 529
- 530 Lian Y, Burkitt AN (2022) Learning spatiotemporal properties of hippocampal place cells. *eNeuro* 9.
- 531 Lian Y, Grayden DB, Kameneva T, Meffin H, Burkitt AN (2019) Toward a biologically plausible model of LGN-V1 pathways based on efficient coding. *Front. Neural Circuits* 13:13.
- 532
- 533 Lozano YR, Page H, Jacob PY, Lomi E, Street J, Jeffery K (2017) Retrosplenial and postsubicular head direction cells compared during visual landmark discrimination. *Brain Neurosci. Adv.* 1:1–17.
- 534
- 535 Mao D, Molina LA, Bonin V, McNaughton BL (2020) Vision and locomotion combine to drive path integration sequences in mouse retrosplenial cortex. *Curr. Biol.* 30:1680–1688.
- 536
- 537 Mao D, Neumann AR, Sun J, Bonin V, Mohajerani MH, McNaughton BL (2018) Hippocampus-dependent emergence of spatial sequence coding in retrosplenial cortex. *Proc. Natl. Acad. Sci. USA* 115:8015–8018.
- 538
- 539 Movshon J, Thompson I, Tolhurst D (1978a) Receptive field organization of complex cells in the cat’s striate cortex. *J. Physiol.* 283:79–99.
- 540
- 541 Movshon J, Thompson I, Tolhurst D (1978b) Spatial summation in the receptive fields of simple cells in the cat’s striate cortex. *J. Physiol.* 283:53–77.
- 542

- 543 O'Keefe J (1976) Place units in the hippocampus of the freely moving rat. *Exp. Neurol.* 51:78–109.
- 544 O'Keefe J, Dostrovsky J (1971) The hippocampus as a spatial map: preliminary evidence from unit activity  
545 in the freely-moving rat. *Brain Res.* 34:171–175.
- 546 Olshausen BA, Field DJ (1996) Emergence of simple-cell receptive field properties by learning a sparse  
547 code for natural images. *Nature* 381:607–609.
- 548 Olshausen BA, Field DJ (1997) Sparse coding with an overcomplete basis set: A strategy employed by V1?  
549 *Vision Res.* 37:3311–3325.
- 550 Pedregosa F, Varoquaux G, Gramfort A, Michel V, Thirion B, Grisel O, Blondel M, Prettenhofer P, Weiss R,  
551 Dubourg V et al. (2011) Scikit-learn: Machine learning in Python. *J. Mach. Learn. Res.* 12:2825–2830.
- 552 Prusky GT, West PW, Douglas RM (2000) Behavioral assessment of visual acuity in mice and rats. *Vision*  
553 *Res.* 40:2201–2209.
- 554 Ratliff C, Borghuis B, Kao Y, Sterling P, Balasubramanian V (2010) Retina is structured to process an  
555 excess of darkness in natural scenes. *Proc. Natl. Acad. Sci. USA* 107:17368–17373.
- 556 Raudies F, Hasselmo ME (2012) Modeling boundary vector cell firing given optic flow as a cue. *PLoS*  
557 *Comput. Biol.* 8:e1002553.
- 558 Rozell CJ, Johnson DH, Baraniuk RG, Olshausen BA (2008) Sparse coding via thresholding and local  
559 competition in neural circuits. *Neural Comput.* 20:2526–2563.
- 560 Solstad T, Boccara CN, Kropff E, Moser MB, Moser EI (2008) Representation of geometric borders in the  
561 entorhinal cortex. *Science* 322:1865–1868.
- 562 Stensola H, Stensola T, Solstad T, Frøland K, Moser MB, Moser EI (2012) The entorhinal grid map is  
563 discretized. *Nature* 492:72–78.
- 564 Tadmor Y, Tolhurst D (2000) Calculating the contrasts that retinal ganglion cells and LGN neurones en-  
565 counter in natural scenes. *Vision Res.* 40:3145–3157.

- 566 Taube JS, Muller RU, Ranck JB (1990a) Head-direction cells recorded from the postsubiculum in freely  
567 moving rats. I. Description and quantitative analysis. *J. Neurosci.* 10:420–435.
- 568 Taube JS, Muller RU, Ranck JB (1990b) Head-direction cells recorded from the postsubiculum in freely  
569 moving rats. II. Effects of environmental manipulations. *J. Neurosci.* 10:436–447.
- 570 Troy J, Oh J, Enroth-Cugell C (1993) Effect of ambient illumination on the spatial properties of the center  
571 and surround of Y-cell receptive fields. *Vis. Neurosci.* 10:753–764.
- 572 Uria B, Ibarz B, Banino A, Zambaldi V, Kumaran D, Hassabis D, Barry C, Blundell C (2022) A model of  
573 egocentric to allocentric understanding in mammalian brains. *bioRxiv* .
- 574 Wang C, Chen X, Lee H, Deshmukh SS, Yoganarasimha D, Savelli F, Knierim JJ (2018) Egocentric coding  
575 of external items in the lateral entorhinal cortex. *Science* 362:945–949.

## 576 **A Supplementary Materials**

577 A.1-A.4 of this section provide all learnt cells of both Models recovered by simulated and experimental  
578 trajectories. A.5 provides two examples of learnt EBCs of V1-RSC model that show overlapping wall  
579 response in their ratemaps. Each row with three images below and in the following subsections shows the  
580 spatial ratemap, firing plot with head directions and egocentric ratemap.

581 **A.1 All learnt cells of Raw Visual (RV) model using experimental trajectory**

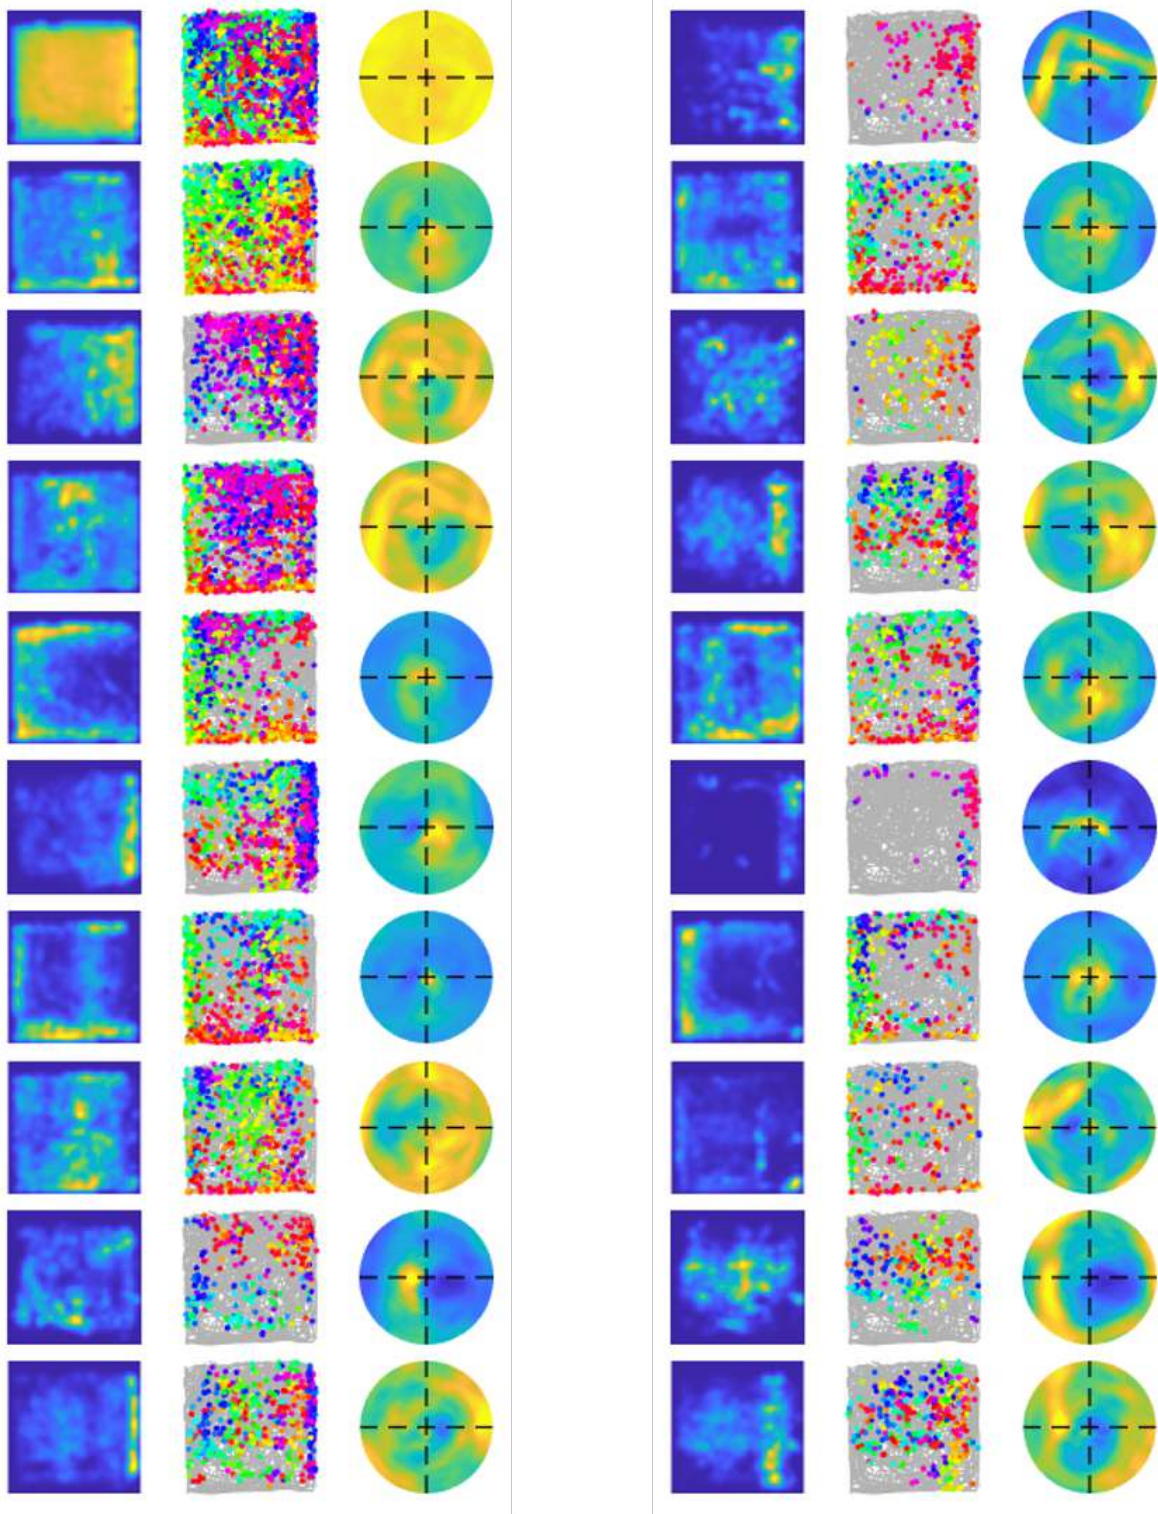

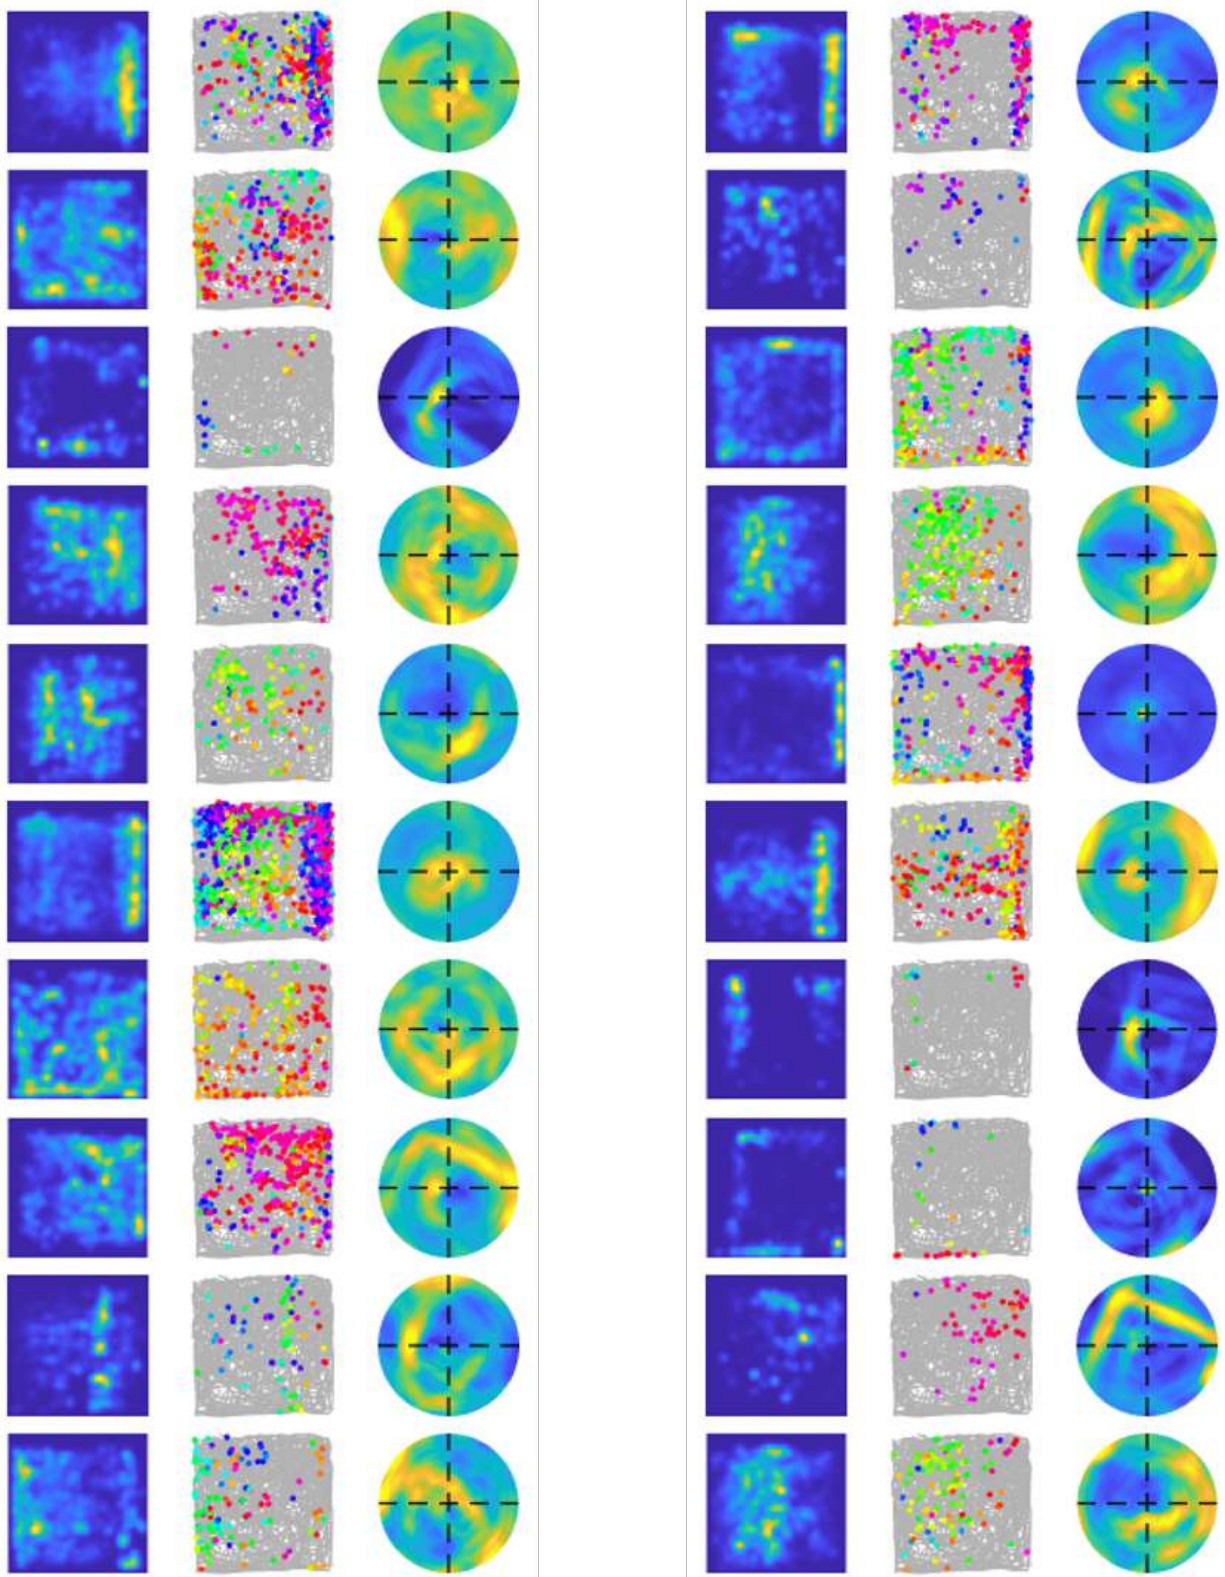



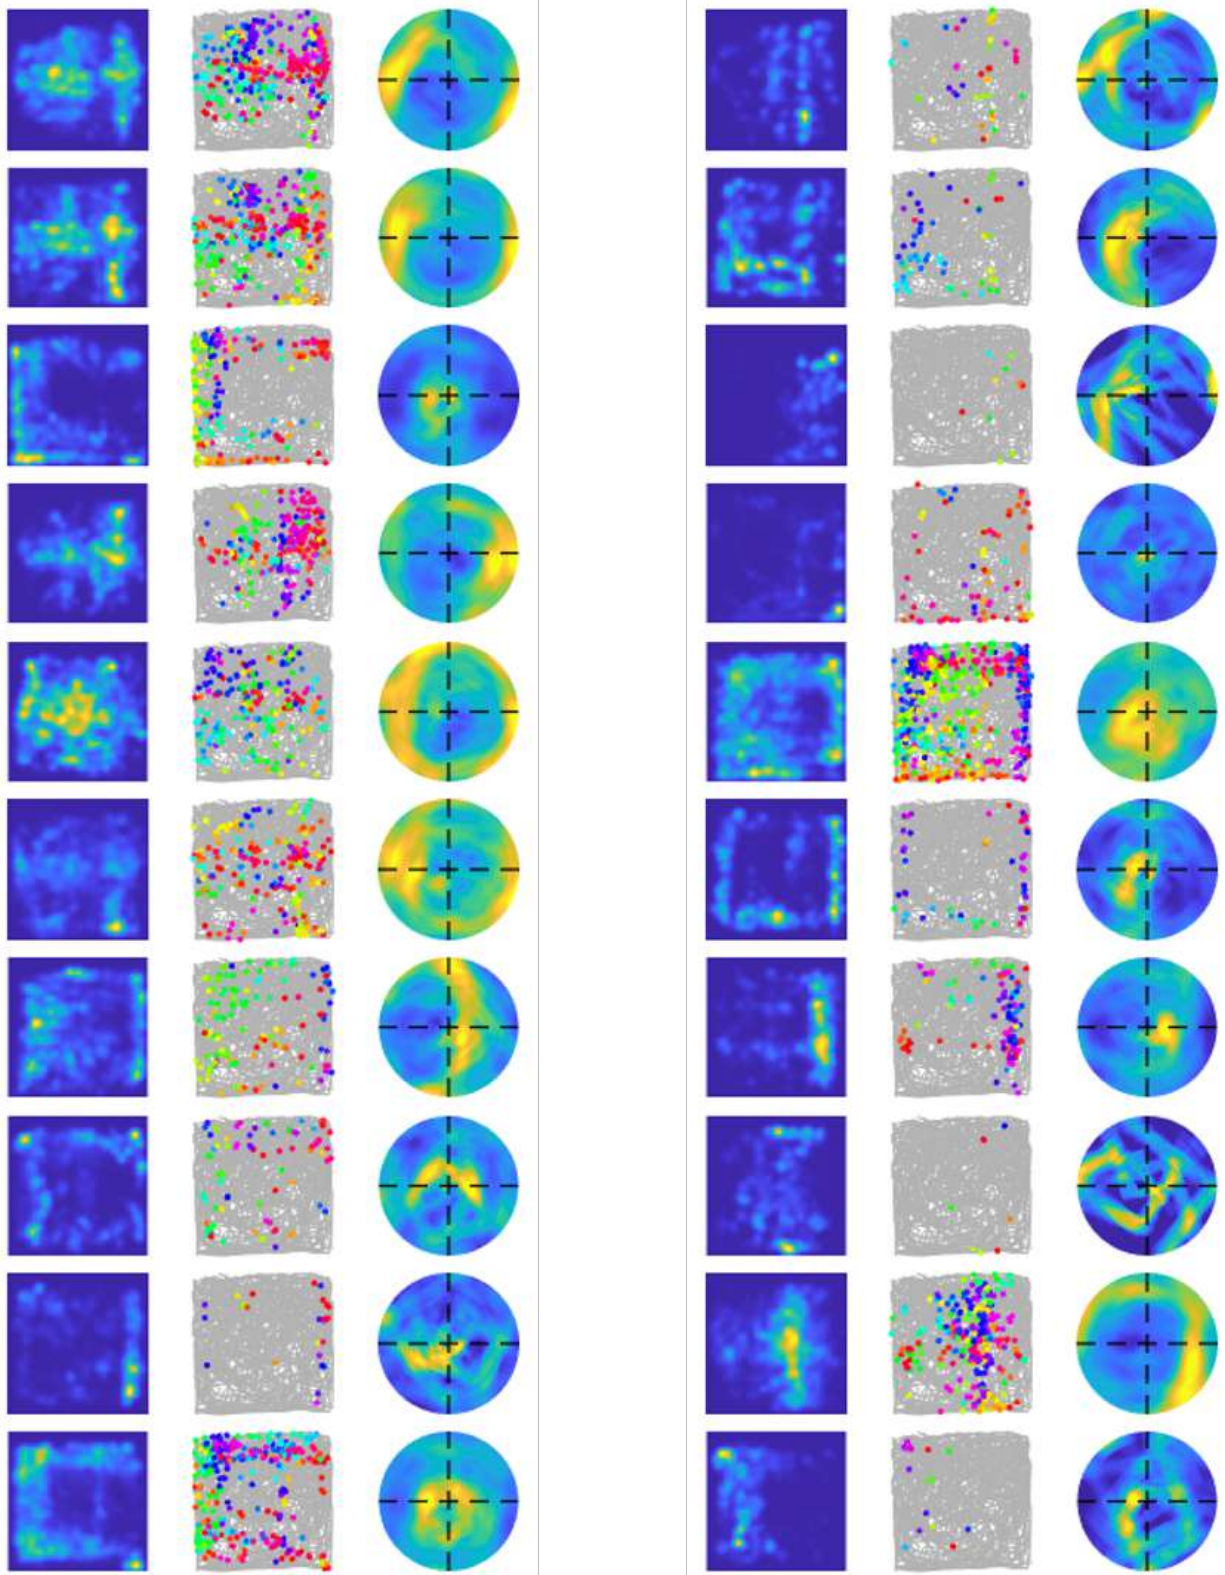

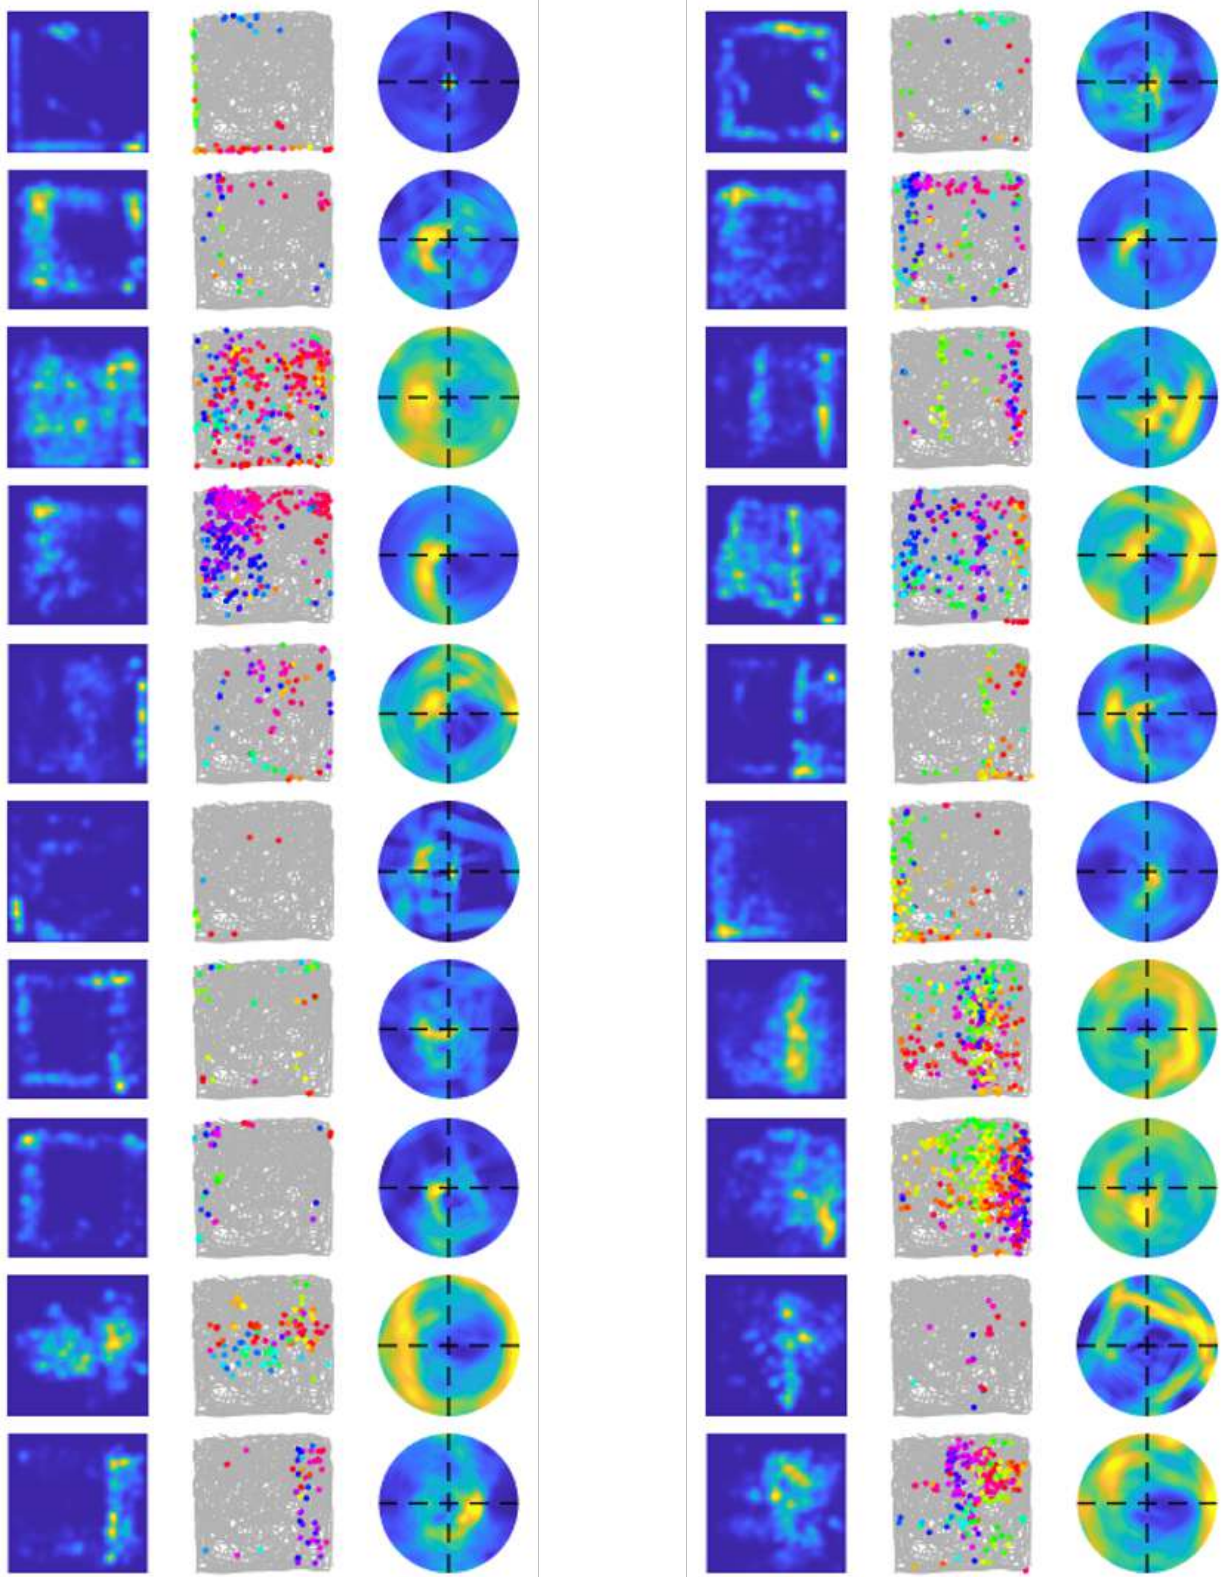

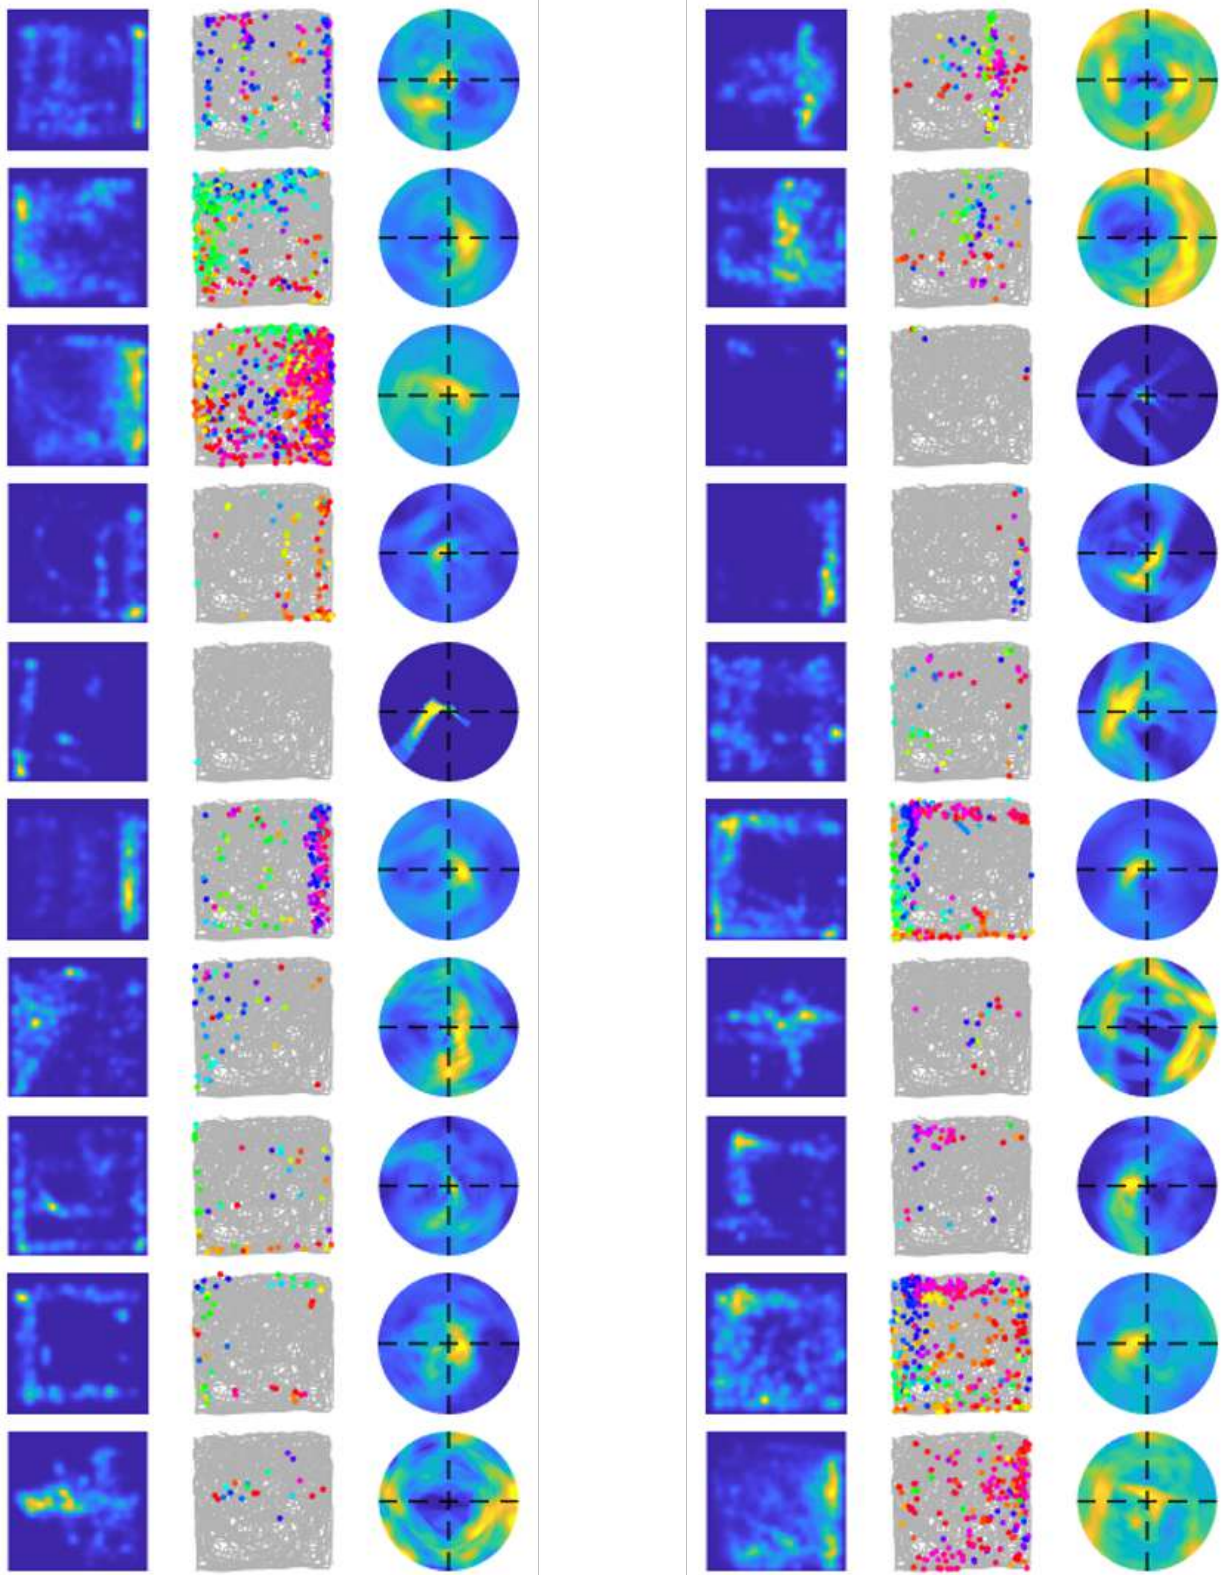

582 **A.2 All learnt cells of Raw Visual (RV) model using simulated trajectory**

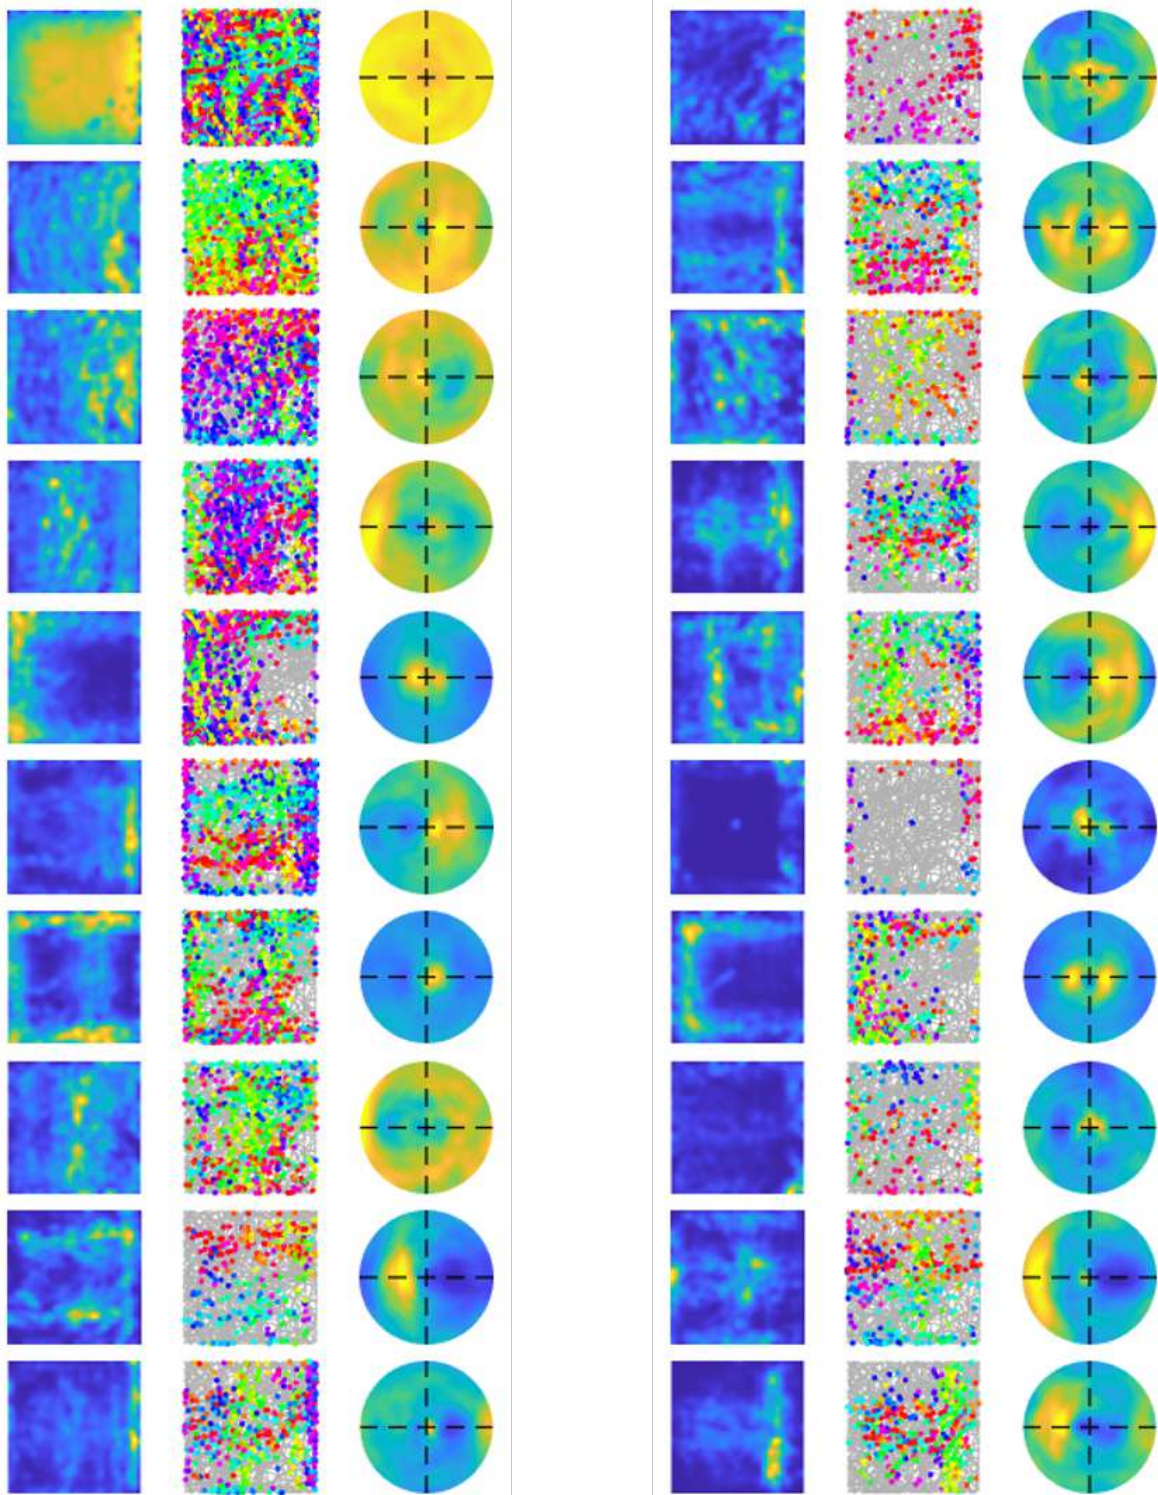

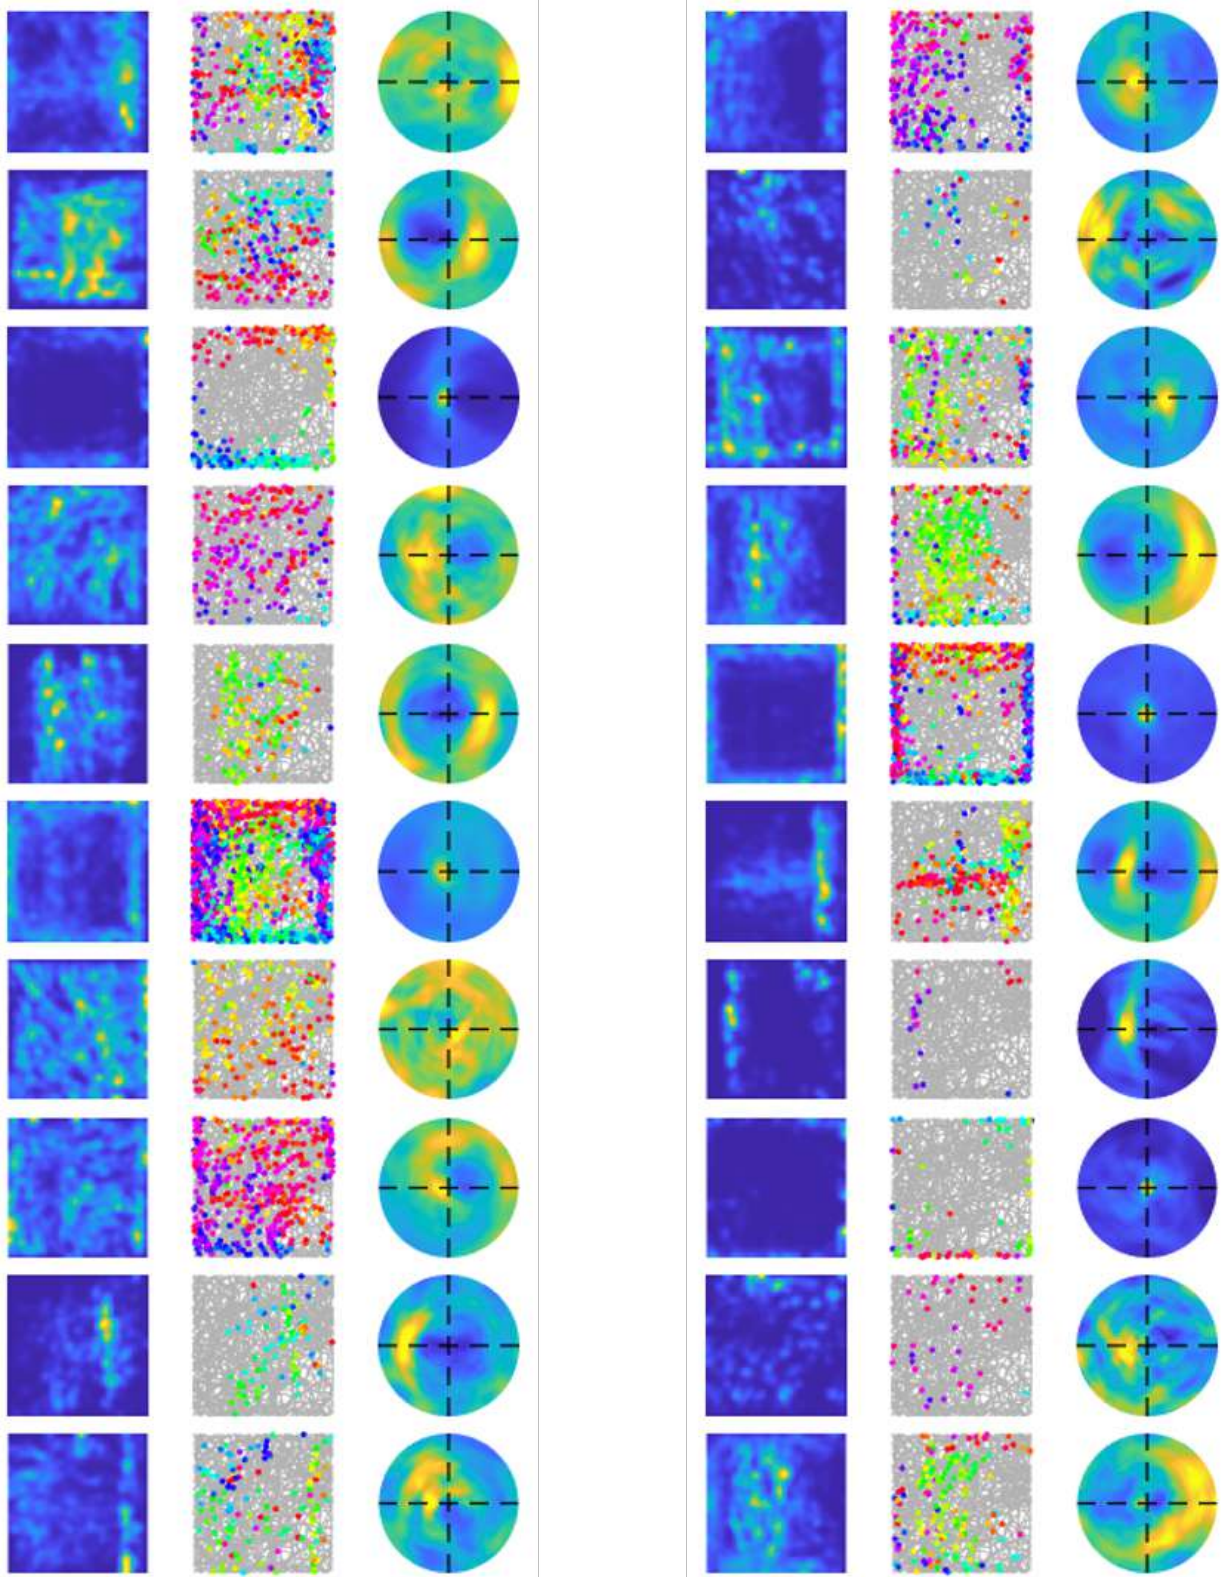

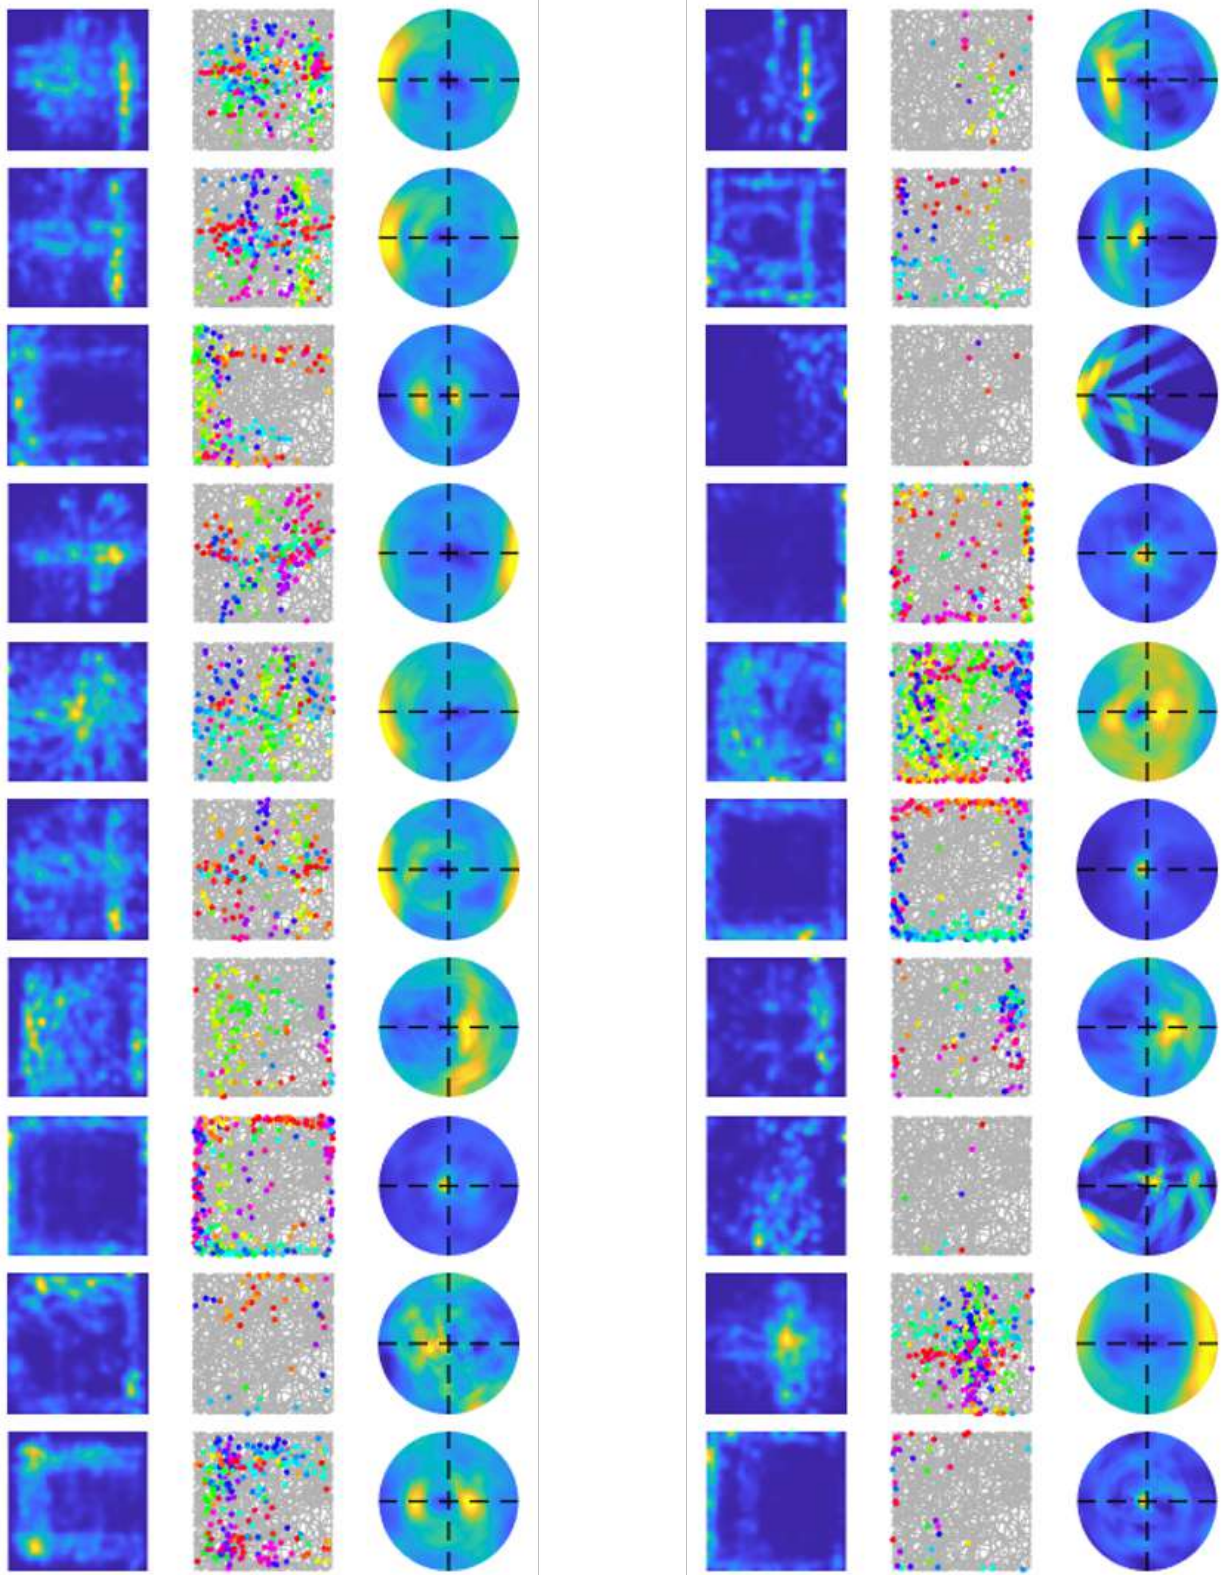

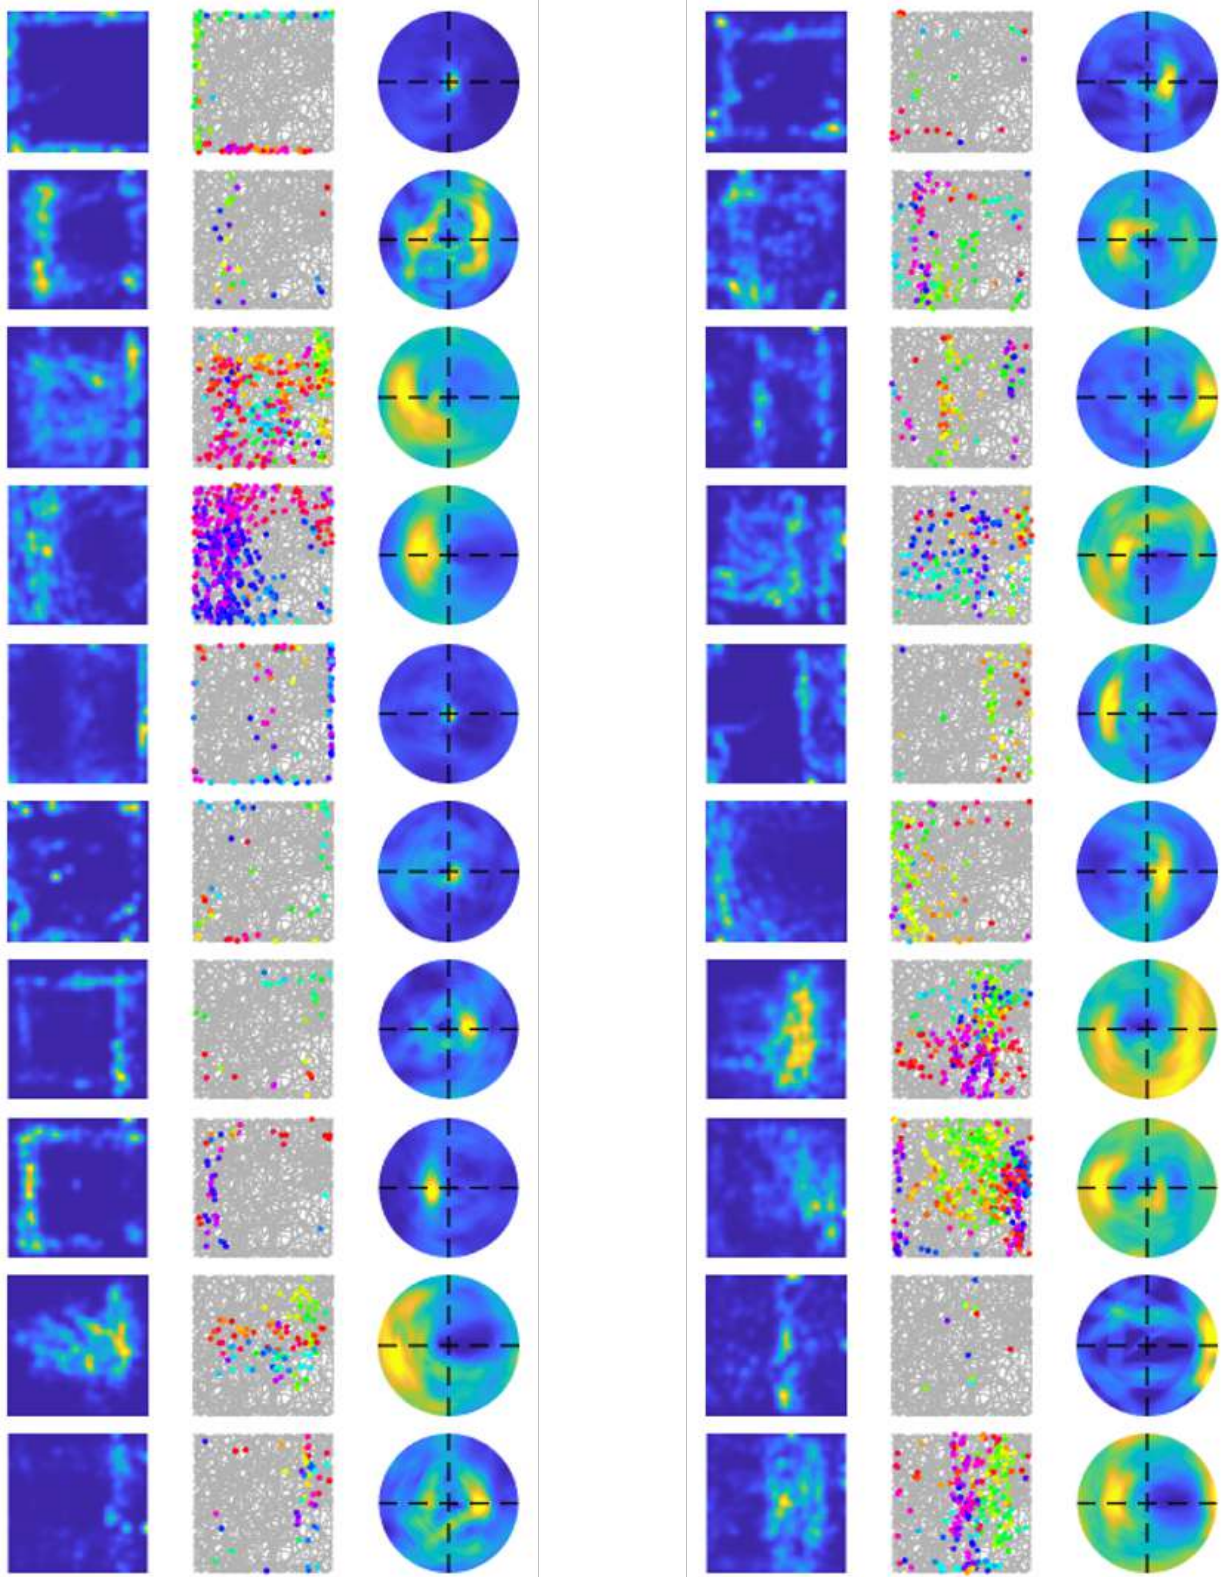

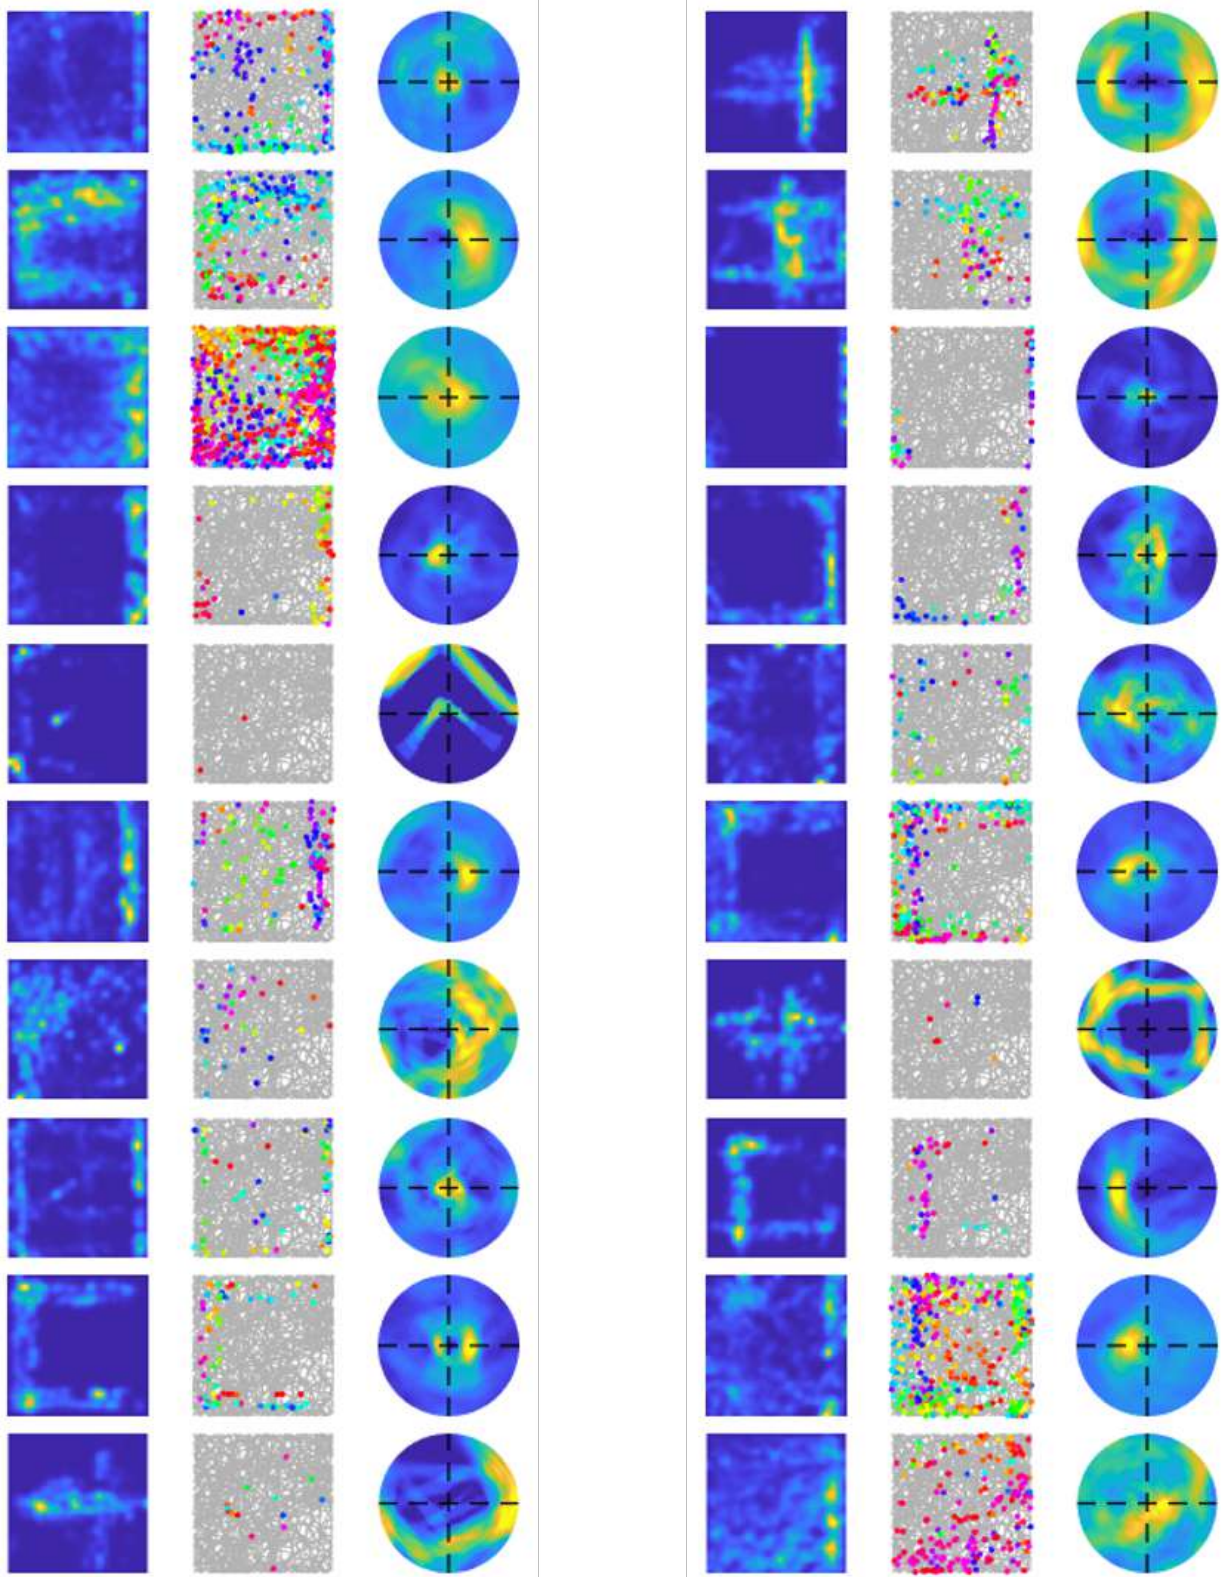



583 **A.3 All learnt cells of V1-RSC model using experimental trajectory**

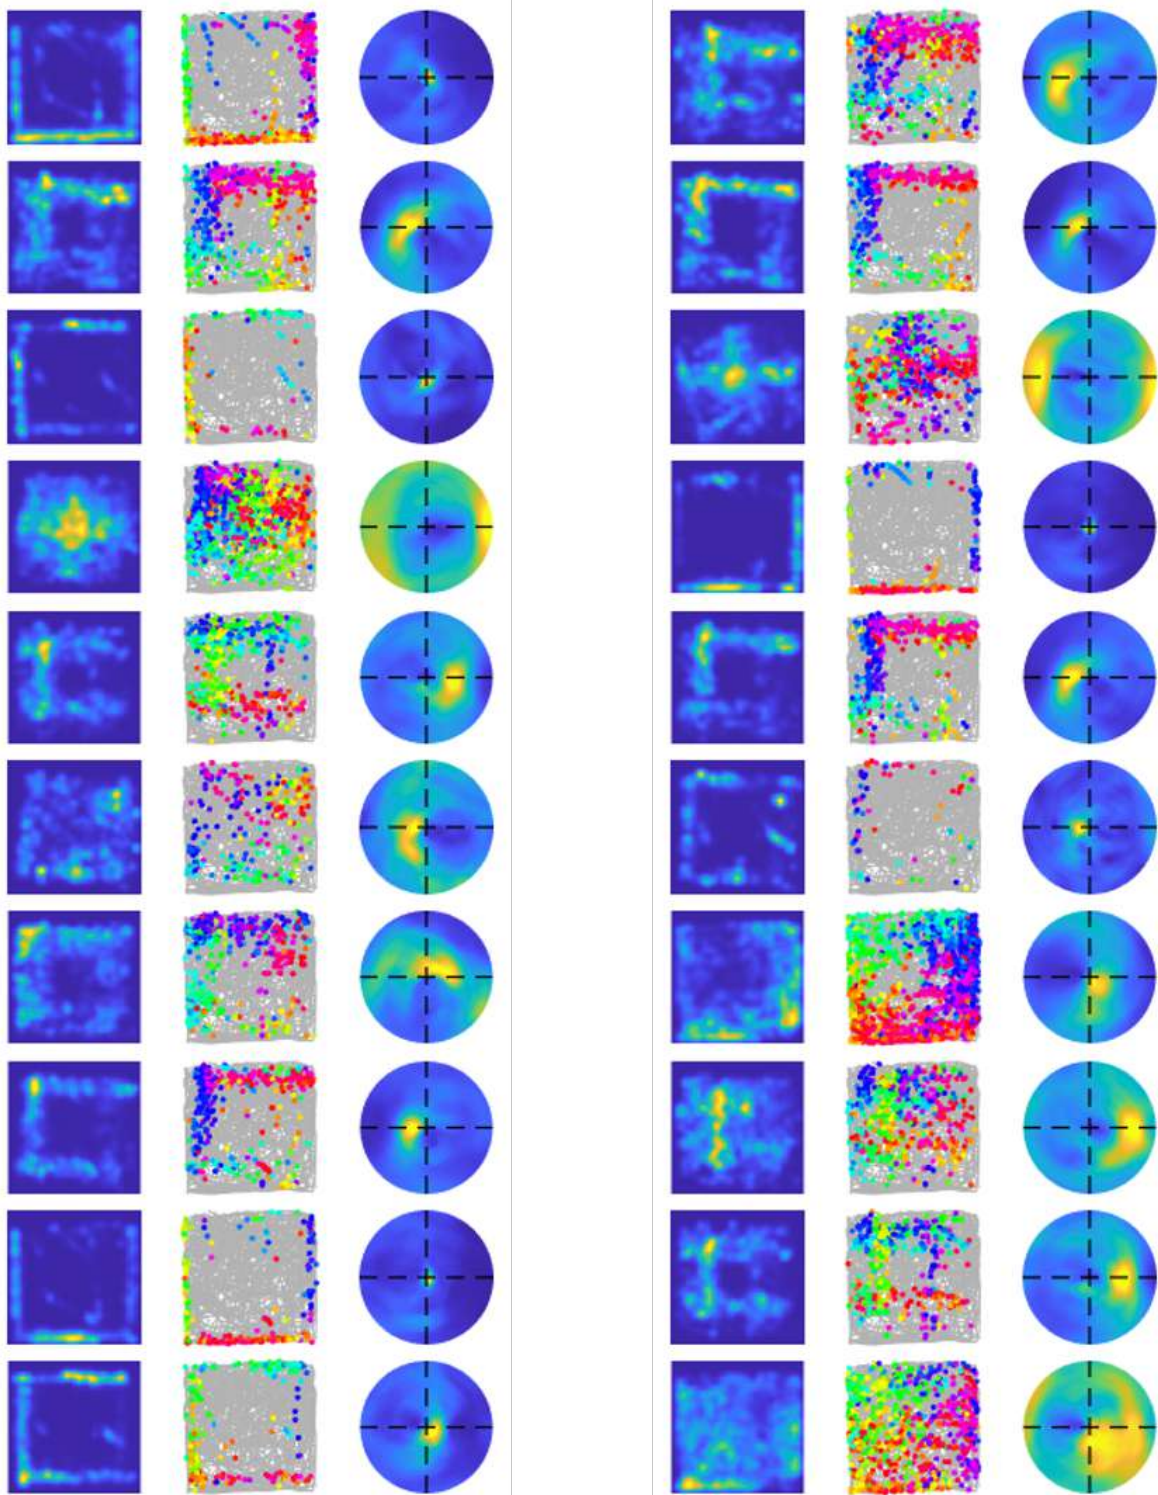

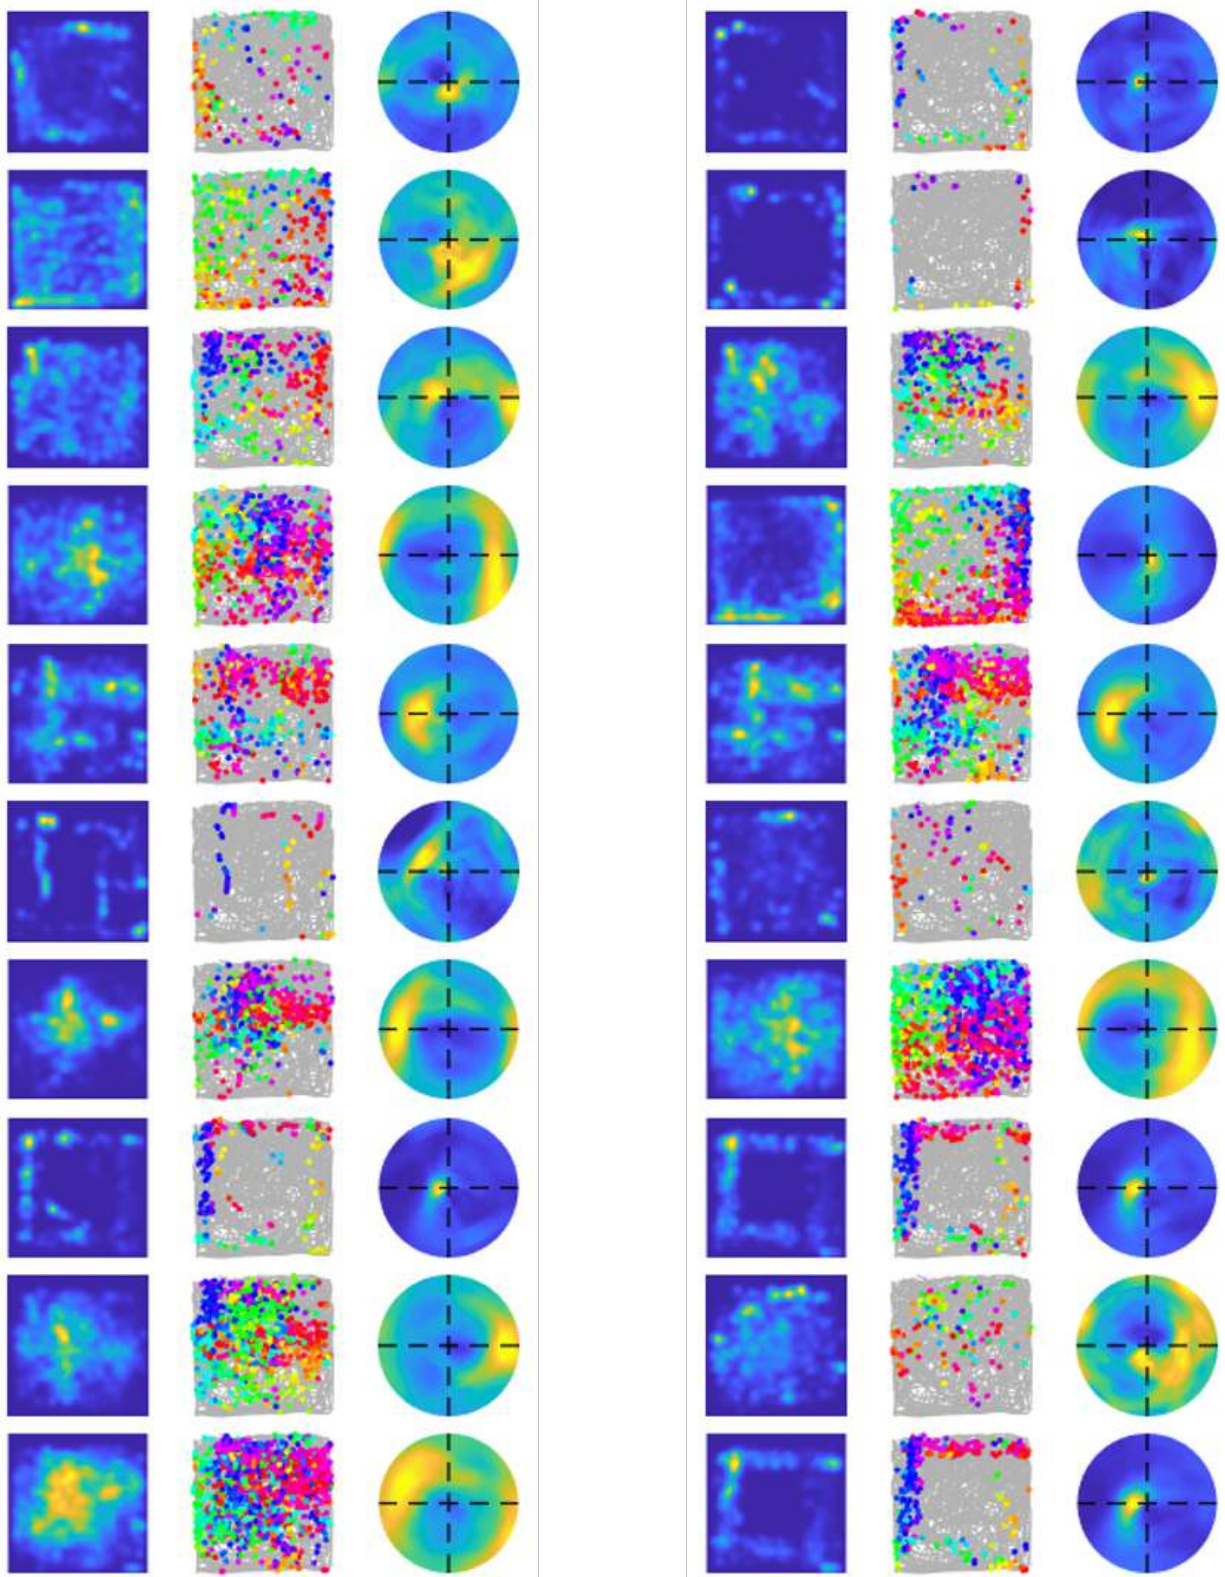

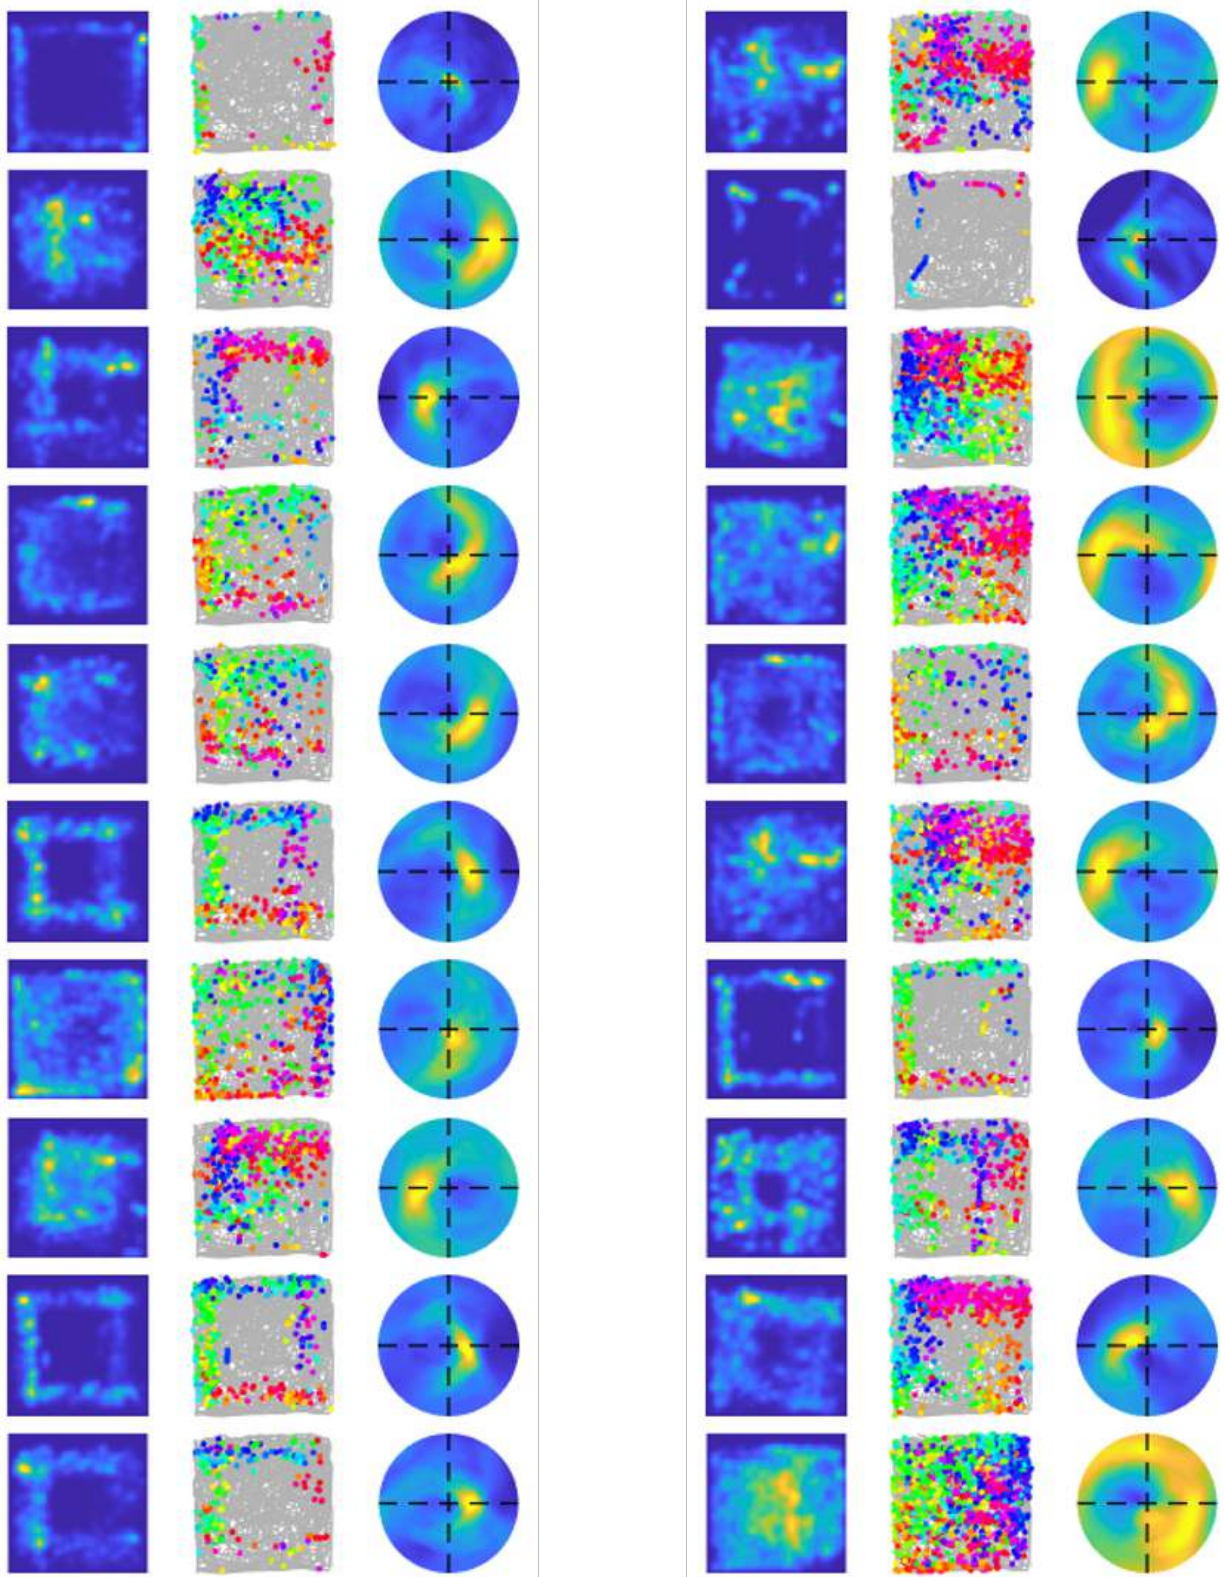

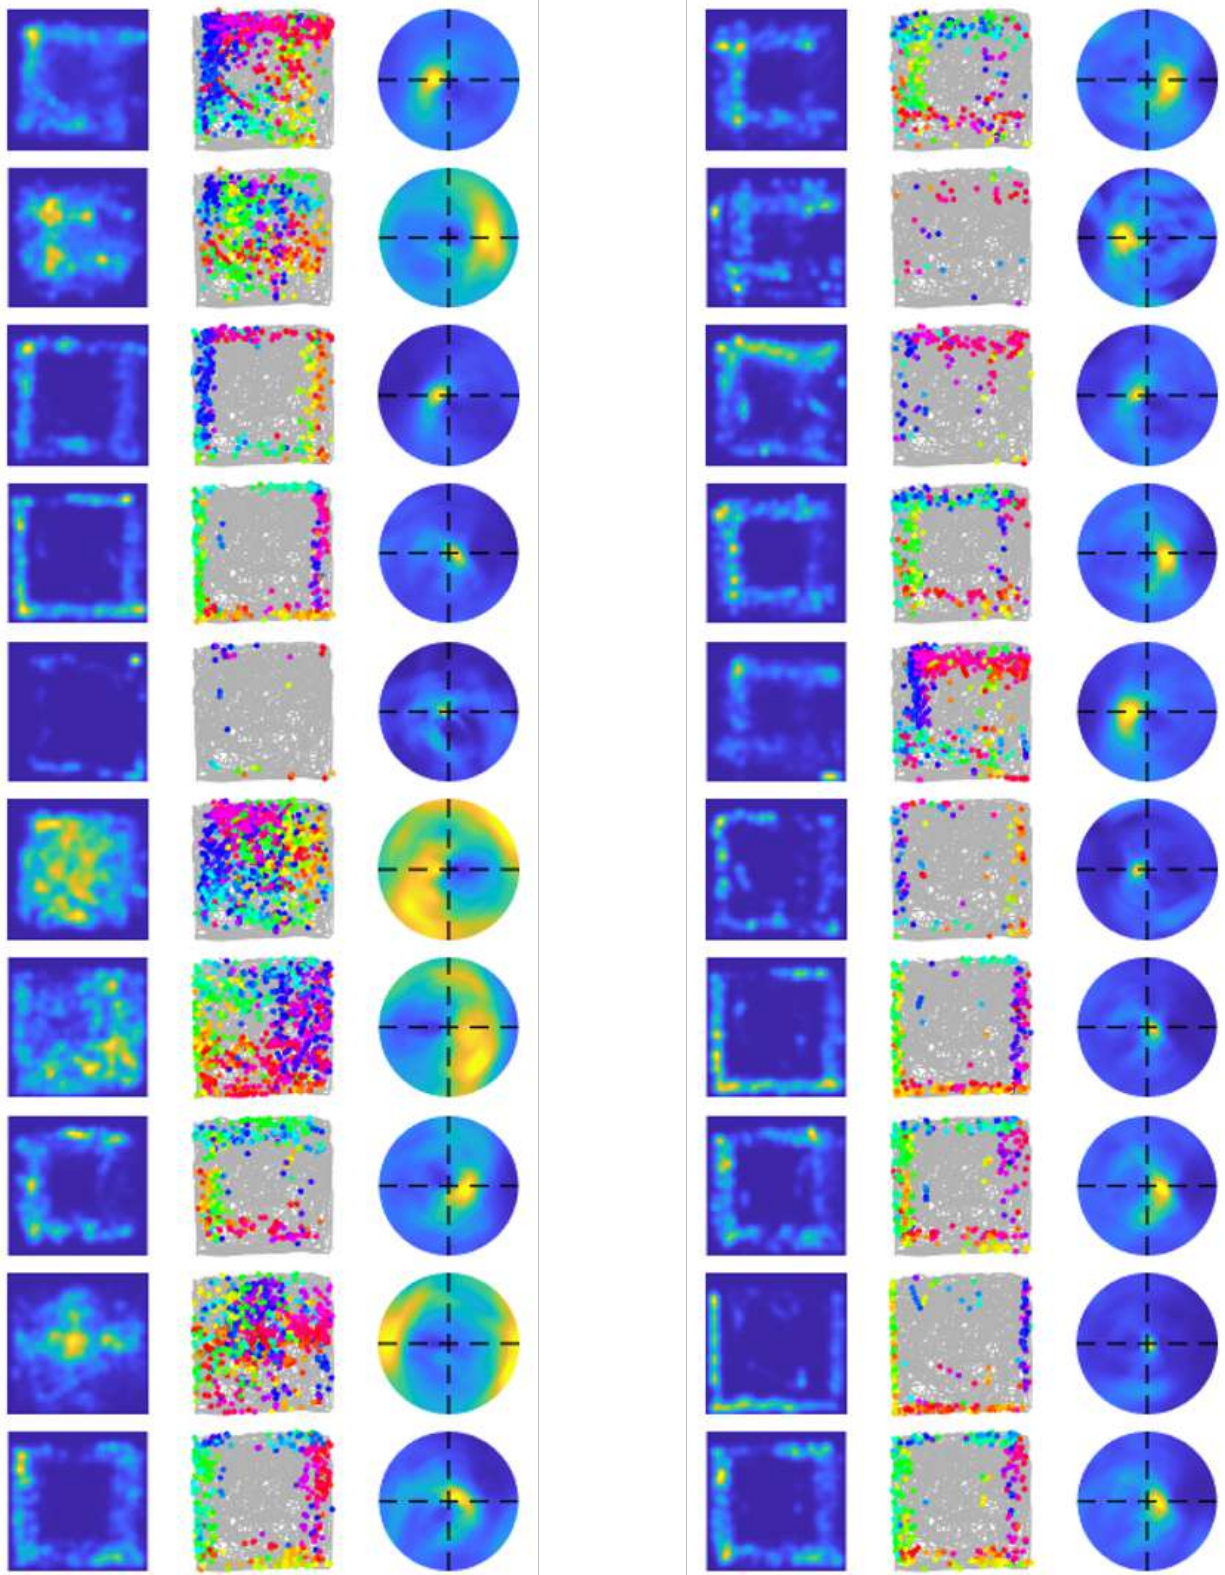

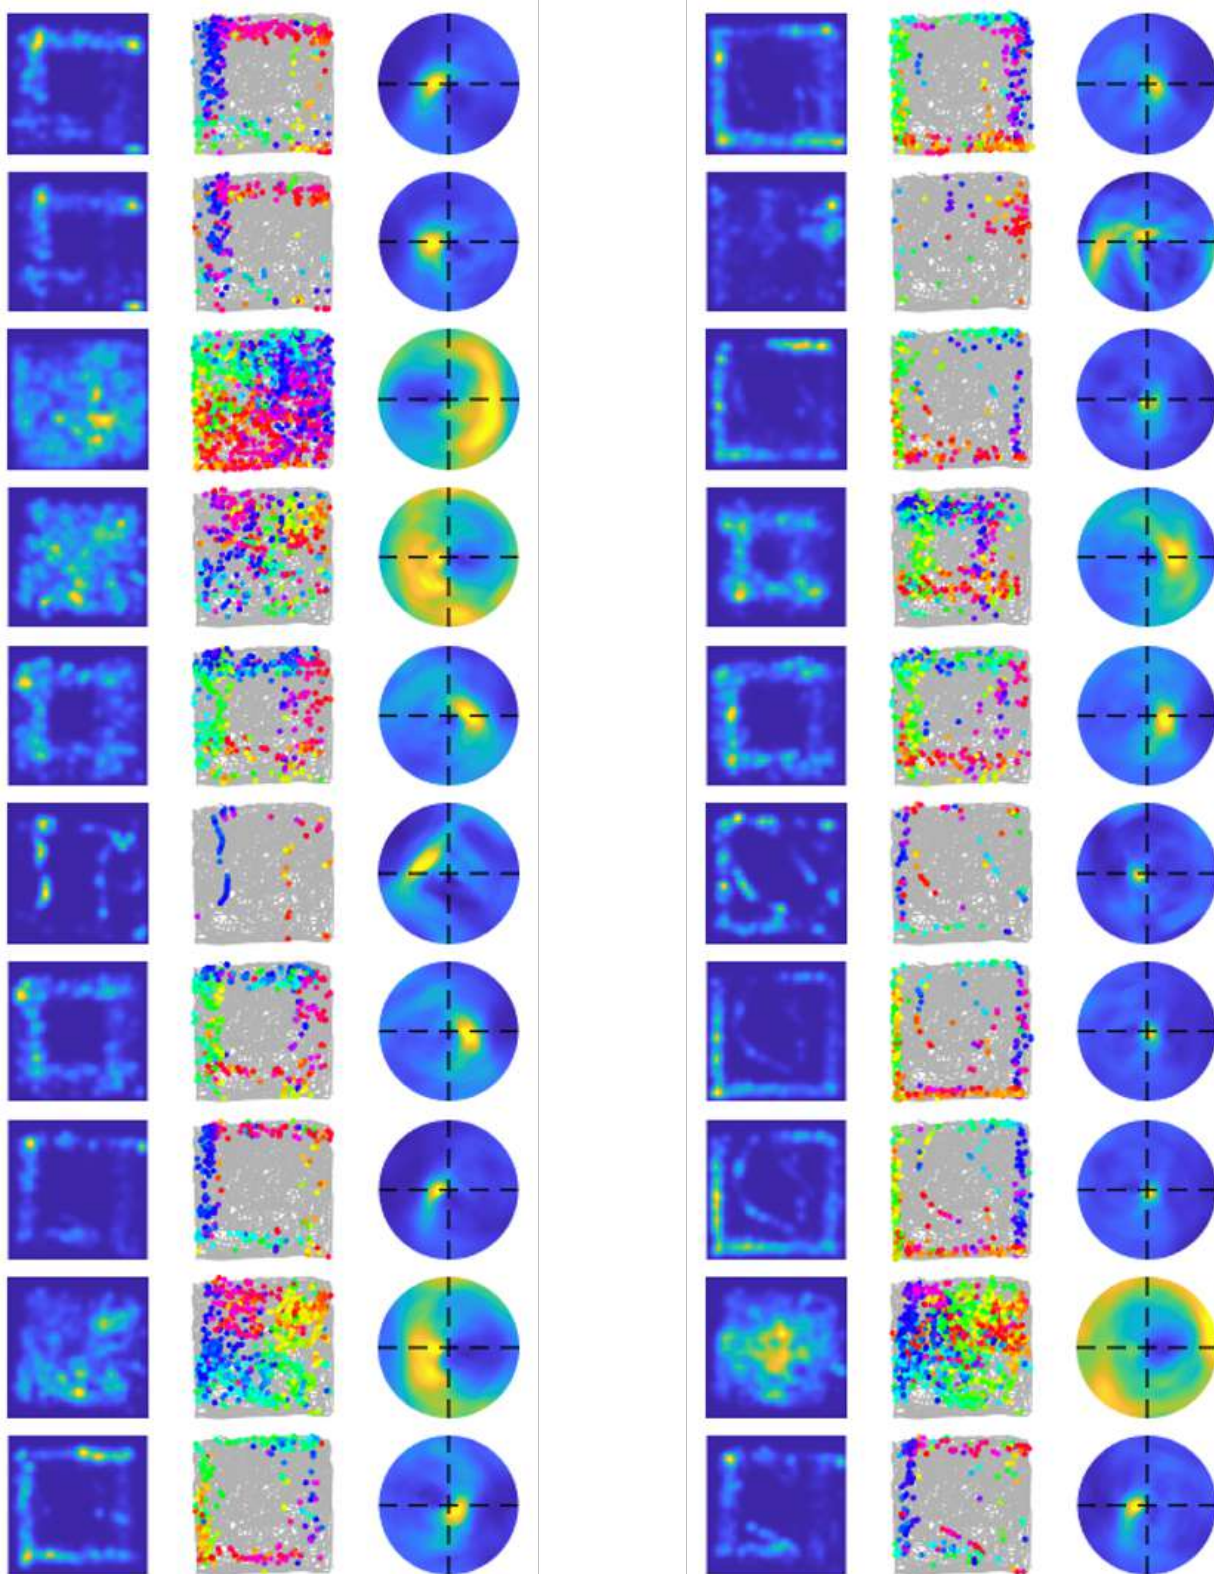

584 **A.4 All learnt cells of V1-RSC model using simulated trajectory**

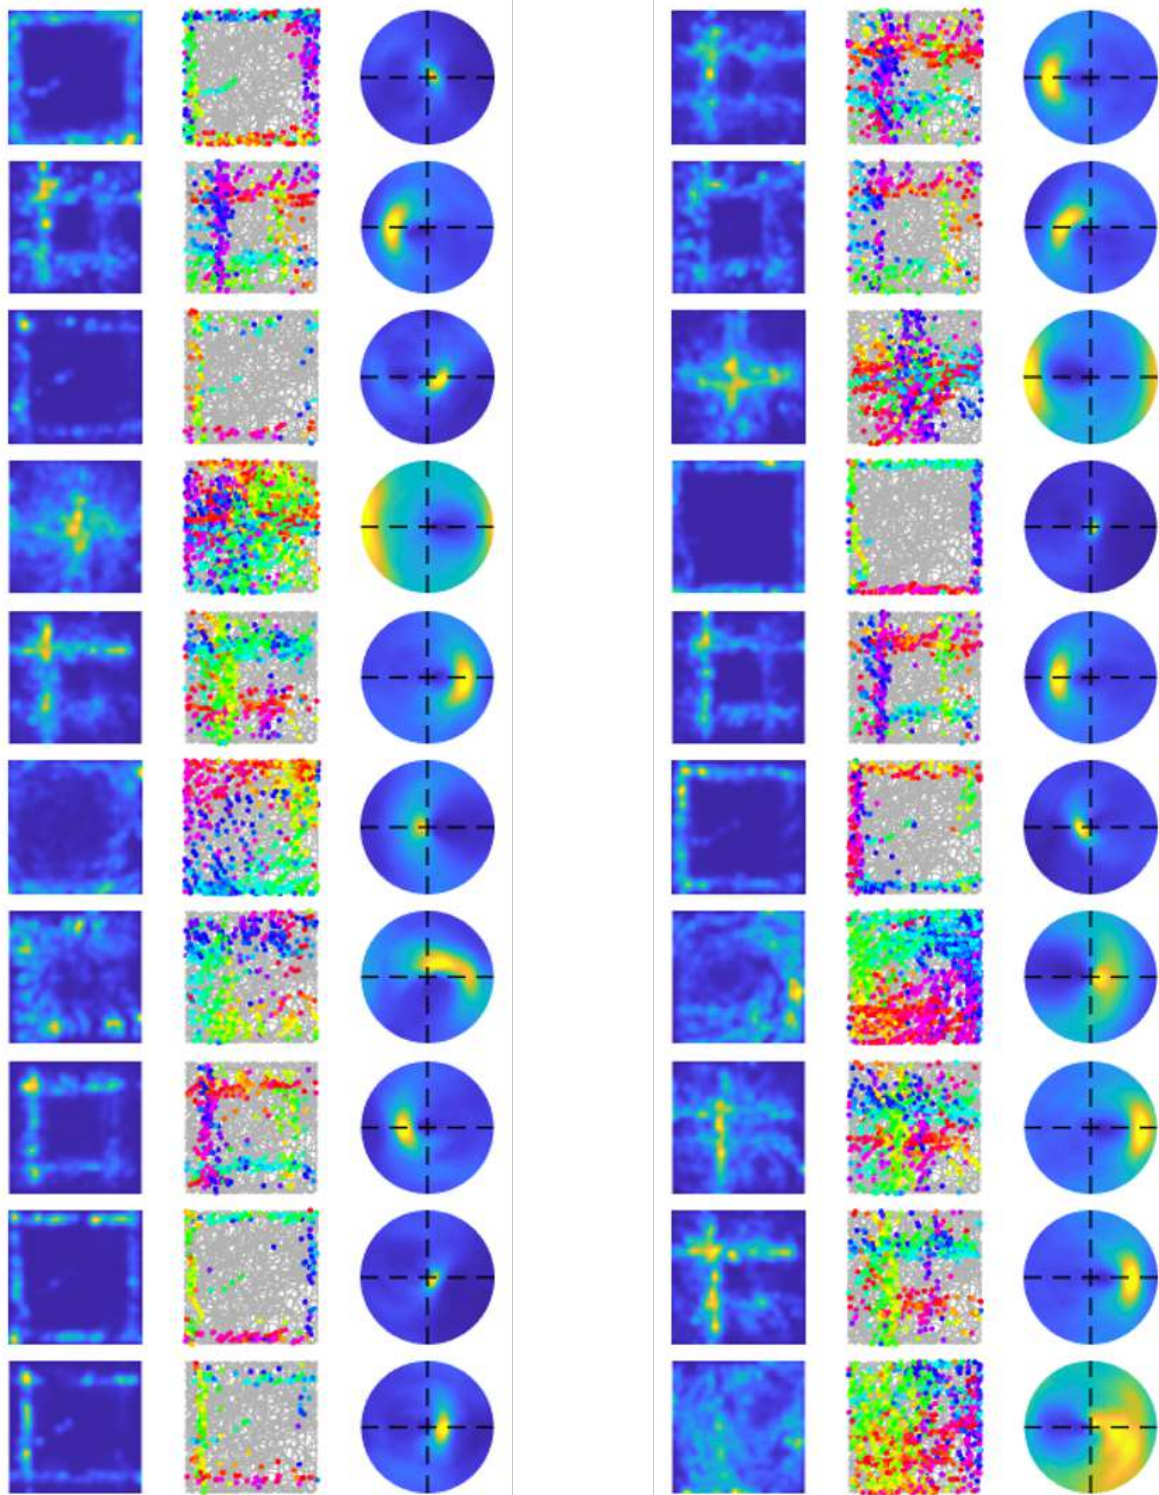

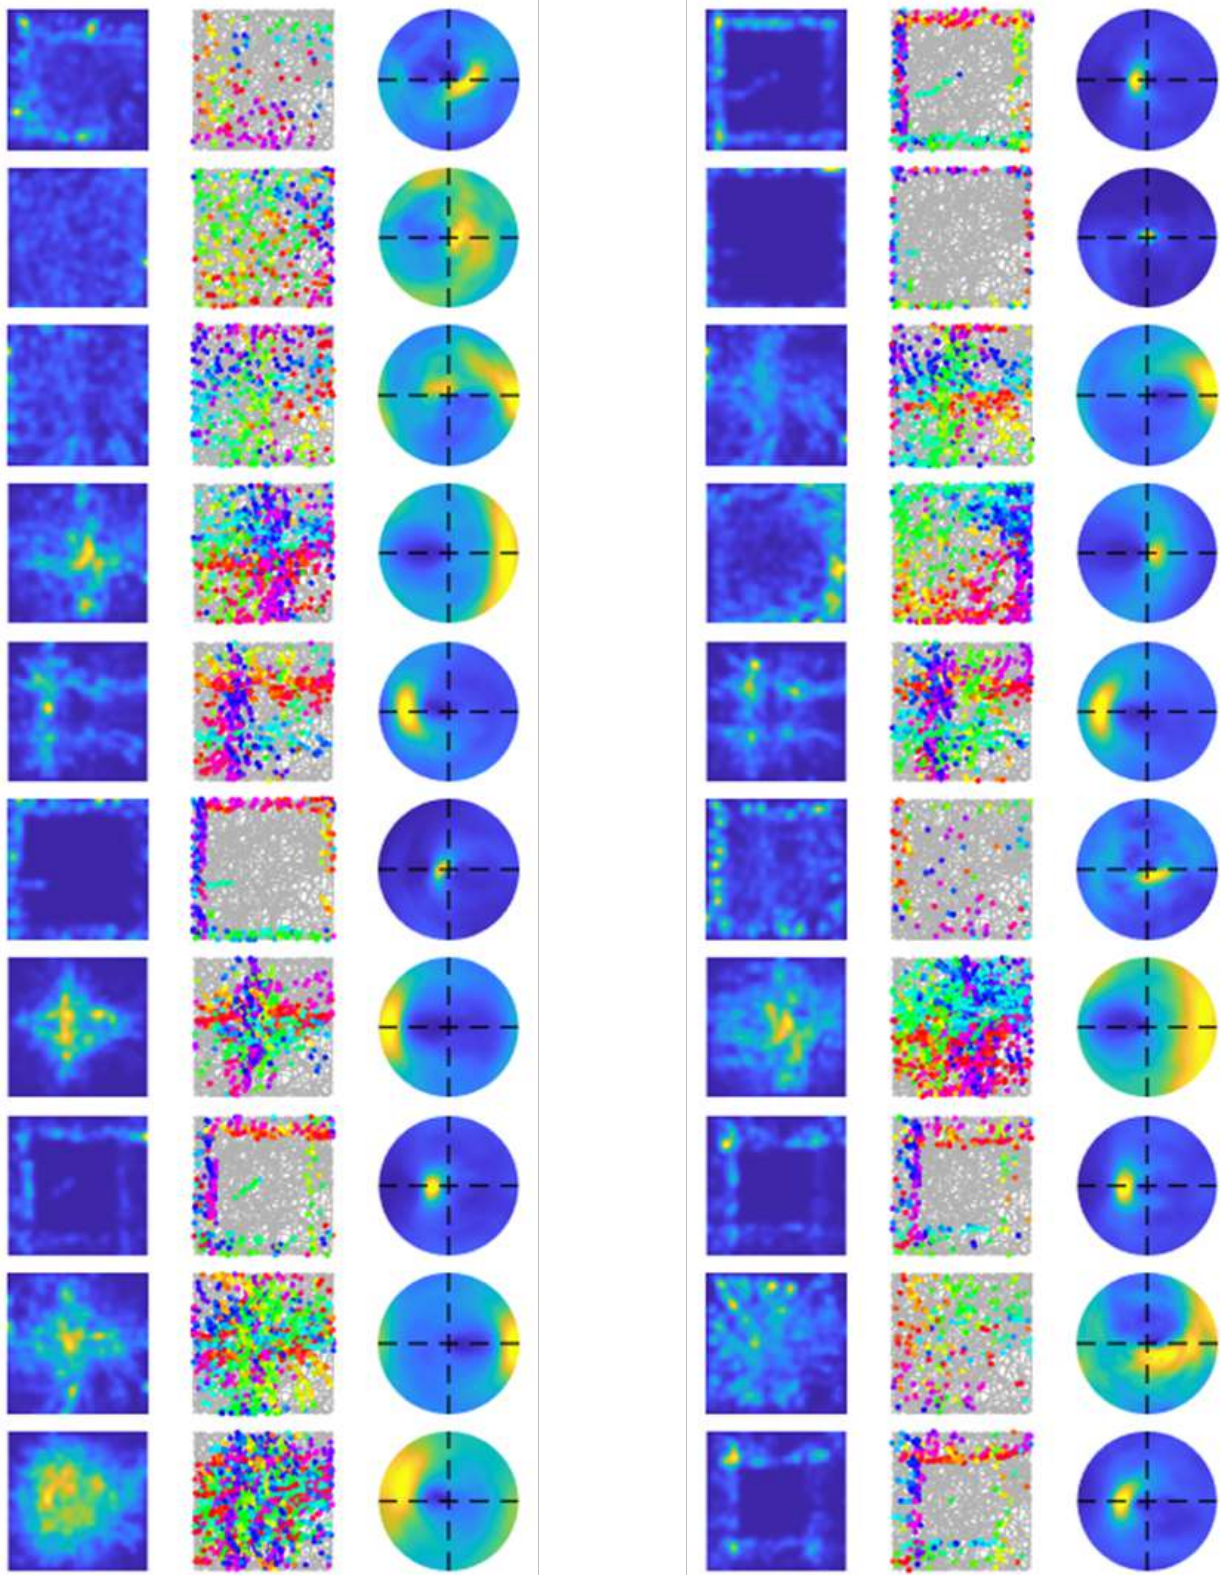

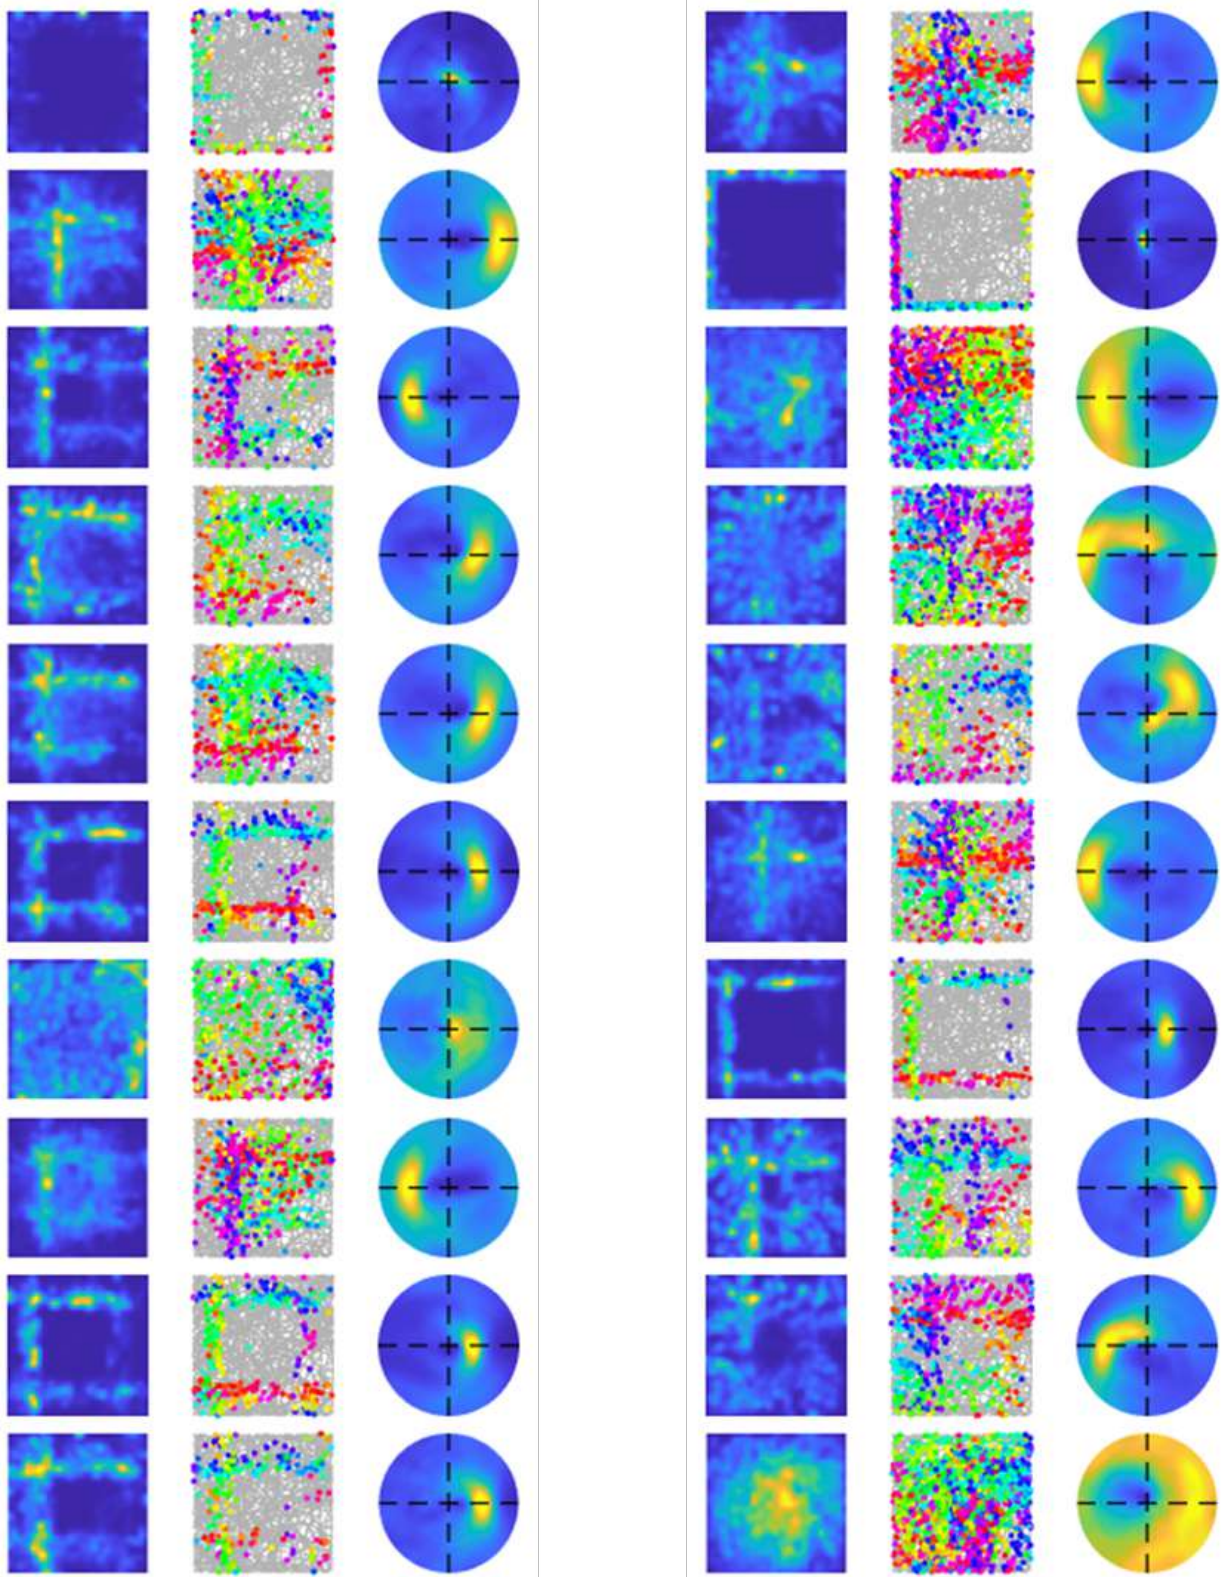



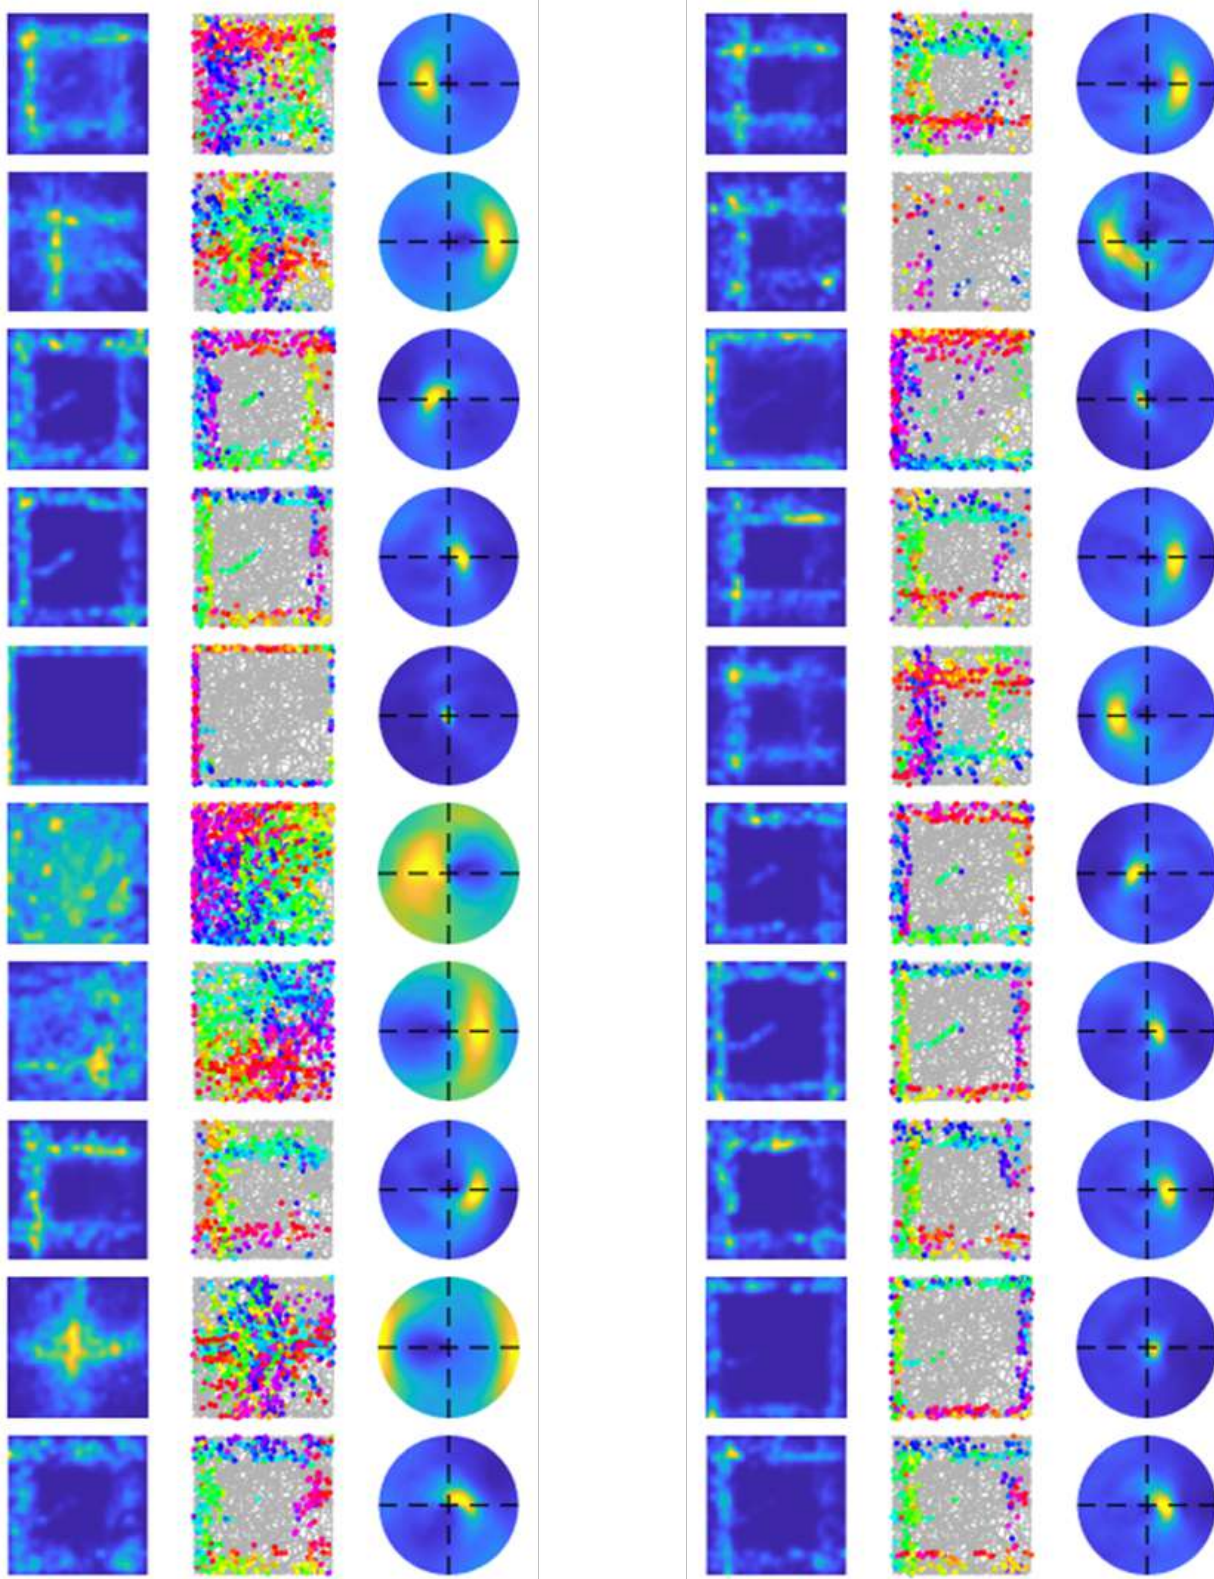

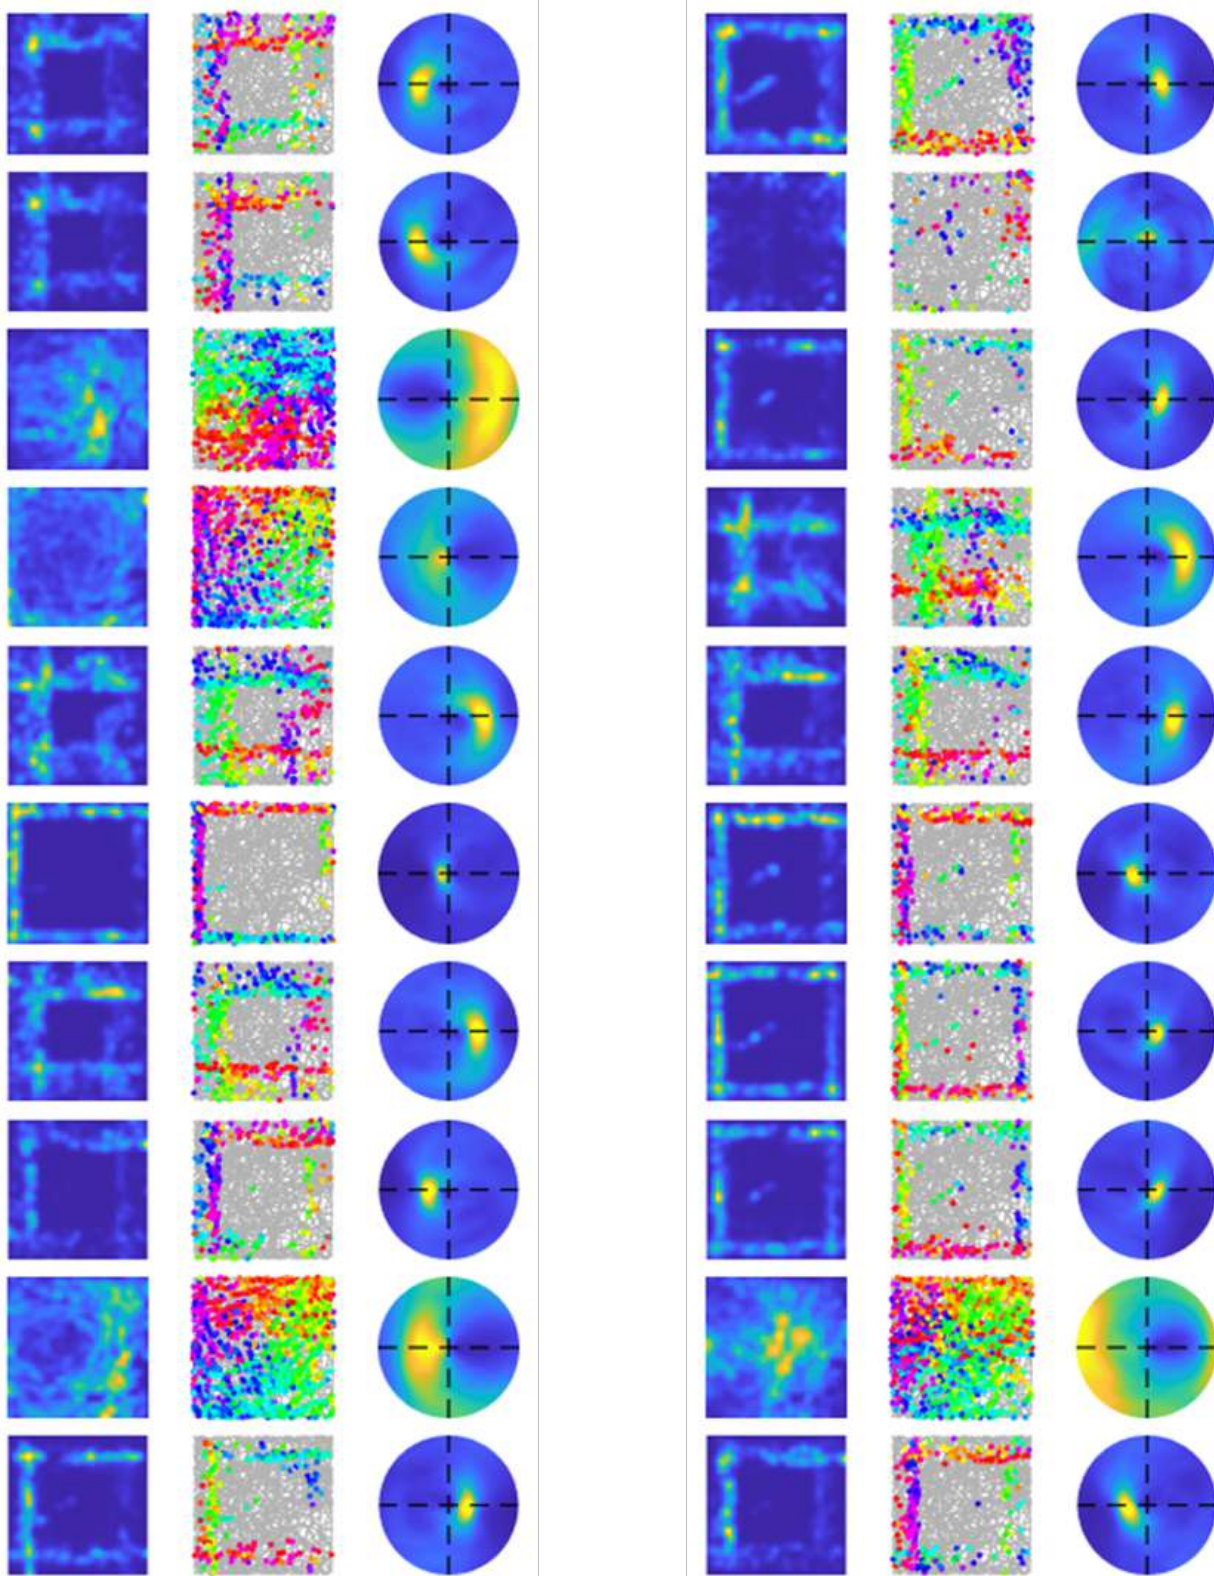

585 **A.5 Examples of learnt EBCs that show overlapping wall response**

586 Plotted here are two examples of learnt EBCs that show overlapping wall response in their ratemaps. Each  
587 row with three images shows the spatial ratemap, firing plot with head directions, and egocentric ratemap.  
588 These two examples of learnt EBCs from the V1-RSC model do not “cut off” the segments close to the  
589 corner such that the spatial ratemaps have overlapping #-like responses.

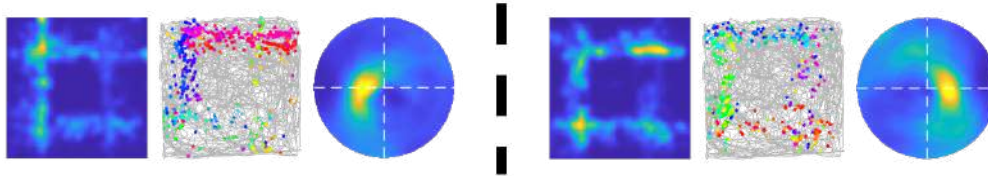

Source: https://www.biorxiv.org/content/10.1101/2022.01.28.478267v2.full.pdf
